# Supplementary material for: Access to 6-hydroxy indolizines and related imidazo[1,5-a]pyridines through the SN2 substitution/condensation/tautomerization cascade process
Source: Royal Society of Chemistry journal article supplement (doi:10.1039/d1ra04425g), 2021-01-01

**Access to 6-hydroxy indolizines and related imidazo[1,5-a]pyridines  
through the S<sub>N</sub>2 substitution/condensation/tautomerization cascade  
process**

Guiyun Duan<sup>1</sup>, Hao Liu<sup>1</sup>, Liqing Zhang, Chunhao Yuan, Yongchao Li, Yanqing Ge\*

*Department of Chemistry and Pharmaceutical Engineering, Shandong First Medical  
University, Shandong Academy of Medical Sciences, Taian, Shandong 271016, P. R.  
China*

**Corresponding Author:** Yanqing Ge

E-mail address: geyanqing2016@126.com

Tel.: +86-538-6229741; Fax: +86-538-6229741

**Table of Contents:**

|                                                                                                       |            |
|-------------------------------------------------------------------------------------------------------|------------|
| Experimental section                                                                                  | <b>S3</b>  |
| Reference                                                                                             | <b>S14</b> |
| Table S1 The optical characteristics of the compounds <b>3a-l</b> in EtOH                             | <b>S14</b> |
| <sup>1</sup> H NMR spectrum of compound <b>1a-f</b> , <b>1h</b> , <b>1i</b> , <b>1k</b> and <b>1l</b> | <b>S15</b> |
| <sup>1</sup> H NMR, <sup>13</sup> C NMR and HRMS spectrum of compound <b>3a-l</b> and <b>5a-c</b>     | <b>S19</b> |

## Experimental section

### General

$^1\text{H}$  NMR and  $^{13}\text{C}$  NMR spectra were measured on a Bruker Avance 400 (400 MHz) spectrometer ( $\text{CDCl}_3$  or  $\text{DMSO-}d_6$  as solvent and tetramethylsilane (TMS) as an internal standard). High-resolution mass spectra (HRMS) were measured on an Agilent 6546 LC/Q-TOF spectrometer using electron spray ionization (ESI) technique. Chromatographic separations were done by column chromatography using 200-300 mesh silica gel. UV-vis spectra and fluorescence spectra were recorded on a UV-2600 spectrometer (Shimadzu) and FS-5 luminescence spectrophotometer (Edinburg) at room temperature, respectively. All reagents and solvents were purchased from commercial sources and used without further purification. 4-Iodo-1*H*-pyrrole-2-carbaldehyde **1g** and ethyl 5-formyl-1*H*-pyrrole-2-carboxylate **1j** were obtained from Innochem.

### Preparation of 4-propionyl-1*H*-pyrrole-2-carbaldehyde **1a**

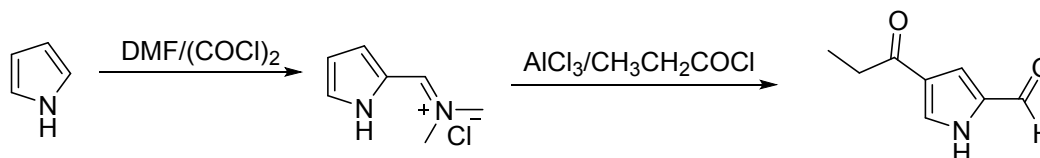

The literature procedure was followed with some modification.<sup>1-2</sup> A solution of dimethylformamide (2.01 g, 27.5 mmol) in 1, 2-dichloroethane (10 mL) in a 3-necked flask was cooled in an ice bath. To the stirred and cooled solution was added a solution of oxalyl chloride (3.49g, 27.5 mmol) in 1, 2-dichloroethane (4 mL) over a period of 20 min. The suspension of white solid was then allowed to stir at room temperature for 1 h. The suspension was cooled in ice and a solution of pyrrole (1.68 g, 25 mmol) in 1, 2-dichloroethane (5 mL) was added over 30 min. The light orange solution obtained was allowed to stir 1 h at room temperature. To this was added aluminum chloride (7.34 g, 55 mmol), followed by propionyl chloride (2.31 g, 25 mmol), rapidly and at room temperature. A small amount of warming occurred and the solution soon darkened. After stirred for 12 h, the mixture was poured onto 200 mL of ice and water, 50% aqueous NaOH solution (20 mL) was added, and the

mixture was stirred rapidly for 30 min. The mixture was then made slightly acidic (pH = 4) with concentrated hydrochloric acid. The organic and aqueous layers were separated. The aqueous layer was extracted with CH<sub>2</sub>Cl<sub>2</sub> (60 mL × 10). The combined organic layer and CH<sub>2</sub>Cl<sub>2</sub> extract was dried (Na<sub>2</sub>SO<sub>4</sub>), evaporated, and the crude product was purified by column chromatography (hexane/EA = 5/1) to afford **2a** (2.87 g, 76%) as a grey solid. <sup>1</sup>H NMR (400 MHz, CDCl<sub>3</sub>) δ 10.60 (s, 1H), 9.59 (s, 1H), 7.75 (t, *J* = 1.6 Hz, 1H), 7.41 (t, *J* = 1.6 Hz, 1H), 2.85 (q, *J* = 7.2 Hz, 2H), 1.22 (t, *J* = 7.2 Hz, 3H).

*Preparation of 4-acetyl-1H-pyrrole-2-carbaldehyde 1b.*

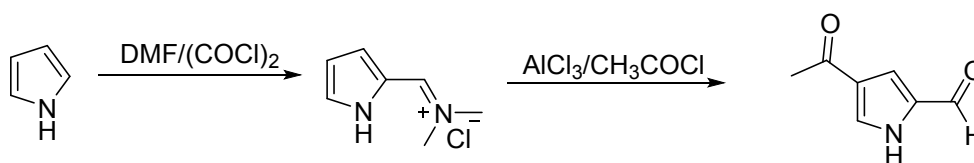

According to the synthesis of compound **2a**, the title compound was synthesized from pyrrole (1.68 g, 25 mmol) and acetyl chloride (1.96 g, 25 mmol). The product mixture was purified by silica gel column chromatography (hexane/EA = 5/1) to afford **2b** (2.47 g, 72%) as a yellow solid. <sup>1</sup>H NMR (400 MHz, CDCl<sub>3</sub>) δ 10.79 (s, 1H), 9.60 (s, 1H), 7.71 (d, *J* = 1.6 Hz, 1H), 7.38 (s, 1H), 2.48 (s, 3H).

*Preparation of 4-benzoyl-1H-pyrrole-2-carbaldehyde 1c.*

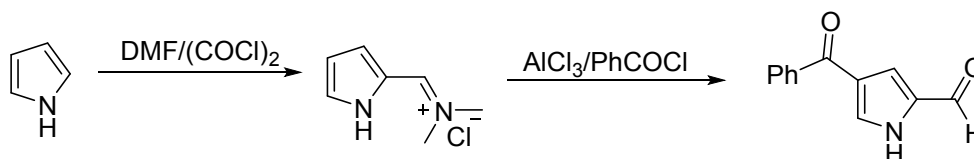

According to the synthesis of compound **2a**, the title compound was synthesized from pyrrole (1.68 g, 25 mmol) and benzoyl chloride (3.51 g, 25 mmol). The product mixture was purified by silica gel column chromatography (hexane/EA = 5/1) to afford **2c** (4.08 g, 82%) as a yellow solid. <sup>1</sup>H NMR (400 MHz, CDCl<sub>3</sub>) δ 10.55 (s, 1H), 9.62 (s, 1H), 7.85 (dd, *J* = 8.0, 1.6 Hz, 2H), 7.73 (m, 1H), 7.59 (m, 1H), 7.50 (m, 3H).

*Preparation of methyl 5-formyl-1H-pyrrole-3-carboxylate 1d.*

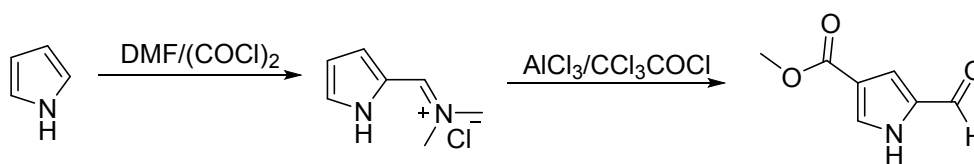

The literature procedure was followed with some modification.<sup>1-2</sup> A solution of dimethylformamide (2.01 g, 27.5 mmol) in 1, 2-dichloroethane (10 mL) in a 3-necked flask was cooled in an ice bath. To the stirred and cooled solution was added a solution of oxalyl chloride (3.49 g, 27.5 mmol) in 1, 2-dichloroethane (4 mL) over a period of 20 min. The suspension of white solid was then allowed to stir at room temperature for 1 h. The suspension was cooled in ice and a solution of pyrrole (1.68 g, 25 mmol) in 1, 2-dichloroethane (5 mL) was added over 30 min. The light orange solution obtained was allowed to stir 1 h at room temperature. To this was added aluminum chloride (7.34 g, 55 mmol), followed by trichloroacetyl chloride (4.55 g, 25 mmol), rapidly and at room temperature.

After stirred for 12 h at room temperature, methanol (50 mL) was added and, after 5 min stirring, solution of sodium (4.00 g, 0.175 mol) in methanol (50 mL) was added and stirring continued for 2 h. The reaction product was then poured into cold water, stirred 10 min, and acidified with concentrated hydrochloric acid. The mixture was extracted with CH<sub>2</sub>Cl<sub>2</sub> (60 mL × 10). The combined organic layer was dried (Na<sub>2</sub>SO<sub>4</sub>), evaporated, and the crude product was purified by column chromatography (hexane/EA = 5/1) to afford **2d** (2.87 g, 75%) as a white solid. <sup>1</sup>H NMR (400 MHz, CDCl<sub>3</sub>) δ 10.20 (s, 1H), 9.57 (s, 1H), 7.70 (d, *J* = 1.6 Hz, 1H), 7.39 (s, 1H), 3.86 (s, 3H).

*Preparation of 1H-pyrrole-2,4-dicarbaldehyde 1e.*

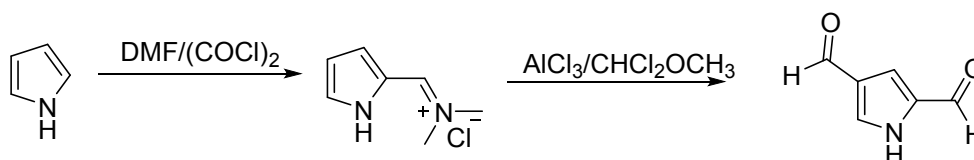

The literature procedure was followed with some modification.<sup>1-2</sup> A solution of dimethylformamide (2.01 g, 27.5 mmol) in 1, 2-dichloroethane (10 mL) in a 3-necked flask was cooled in an ice bath. To the stirred and cooled solution was added a

solution of oxalyl chloride (3.49 g, 27.5 mmol) in 1, 2-dichloroethane (4 mL) over a period of 20 min. The suspension of white solid was then allowed to stir at room temperature for 1 h. The suspension was cooled in ice and a solution of pyrrole (1.68 g, 25 mmol) in 1, 2-dichloroethane (5 mL) was added over 30 min. The light orange solution obtained was allowed to stir 1 h at room temperature. To this was added aluminum chloride (7.34 g, 55 mmol), followed by nitromethane (3.66 g, 60 mmol), rapidly and at room temperature. Then the mixture was cooled to 0 °C. Dichloromethyl methyl ether (2.88 g, 25 mmol) was added all at once and the cooling bath removed shortly after. The solution was stirred for 12 h at room temperature and worked up in the usual manner giving a yellow-brown solid. The crude product was purified by column chromatography (hexane/EA = 5/1) to afford **2e** (1.85 g, 60%) as a yellow solid. <sup>1</sup>H NMR (400 MHz, CDCl<sub>3</sub>) δ 10.18 (s, 1H), 9.89 (s, 1H), 9.64 (s, 1H), 7.72 (d, *J* = 2.0 Hz, 1H), 7.42 (s, 1H).

*Preparation of 4-bromo-1H-pyrrole-2-carbaldehyde 1f.*

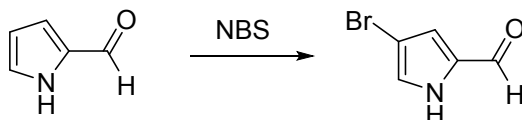

The literature procedure was followed with some modification.<sup>3</sup> A solution of pyrrole-2-carboxaldehyde (3.80 g, 40 mmol) in THF (40 mL) was cooled to 0 °C under nitrogen in a 100 mL round bottom flask. NBS (7.12 g, 40 mmol) was added all at once. The reaction mixture was stirred for 15 min at 0 °C under nitrogen. The solvent was removed on a rotary evaporator. Water (20 mL) was added to the flask and the suspension was filtered. The filter cake was washed with an additional 20 mL of water. The solid was crystallized from the EtOH/H<sub>2</sub>O solution (100 mL, EtOH/H<sub>2</sub>O = 1:9) to give 4.82g of product (69%). <sup>1</sup>H NMR (400 MHz, CDCl<sub>3</sub>) δ 10.10 (s, 1H), 9.39 (s, 1H), 7.07 (t, *J* = 1.6 Hz, 1H), 6.91 (t, *J* = 1.6 Hz, 1H).

*Preparation of 4-nitro-1H-pyrrole-2-carbaldehyde 1h and 5-nitro-1H-pyrrole-2-carbaldehyde 1i*

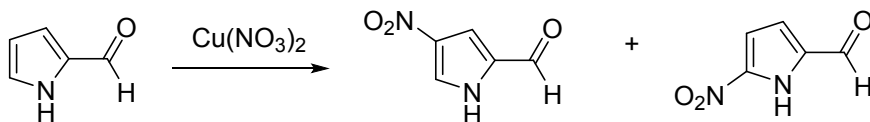

The literature procedure was followed with some modification.<sup>3</sup> The solution of pyrrole-2-carboxaldehyde (0.95 g, 1 mmol) in carbon tetrachloride (5 mL) was treated with copper nitrate trihydrate (3.62 g, 1.5 mmol) and acetic anhydride (5.10 g, 5 mmol) and heated at 50 °C. After completion of the reaction (monitored by TLC), the reaction mixture was quenched with H<sub>2</sub>O (20 mL) and extracted with EtOAc (20 mL × 2). The organic layer was dried (Na<sub>2</sub>SO<sub>4</sub>) and concentrated. The crude product was purified by column chromatography (hexane/EA = 9/1) to afford **1h** (0.49 g, 35%) and **1i** (0.37 g, 26%).

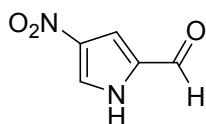

<sup>1</sup>H NMR (400 MHz, DMSO-*d*<sub>6</sub>) δ 13.27 (s, 1H), 9.60 (s, 1H), 8.24 (s, 1H), 7.63 (s, 1H).

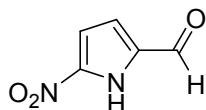

<sup>1</sup>H NMR (400 MHz, DMSO-*d*<sub>6</sub>) δ 14.27 (s, 1H), 9.76 (s, 1H), 7.23 (d, *J* = 4.0 Hz, 1H), 7.06 (d, *J* = 4.0 Hz, 1H).

#### Preparation of methyl 5-formyl-1H-pyrrole-2-carboxylate **1k**

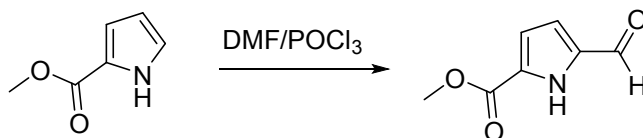

The literature procedure was followed with some modification.<sup>5</sup> POCl<sub>3</sub> (2.30 g, 15 mmol) was added to DMF (1.10 g, 15 mmol) for 30 min at 0 °C under nitrogen condition. The solution was diluted with 1, 2-dichloroethane (10 mL) and stirred for 1 h at room temperature. Methyl 1H-pyrrole-2-carboxylate (1.25 g, 10 mmol) in DCE (10 mL) was added dropwise for 1 h. The reaction mixture was stirred vigorously under reflux condition for 2 h and then neutralized with aq. NaHCO<sub>3</sub> (10 mL). After

extraction with DCM (60 mL×5), the combined organic layer was dried over Na<sub>2</sub>SO<sub>4</sub>, filtered, and concentrated in vacuo. Flash column chromatography (hexane/EA = 2:1) afforded a pure compound as a yellow oil. Yield: 1.00 g (65%). <sup>1</sup>H NMR (400 MHz, CDCl<sub>3</sub>) δ 9.82 (s, 1H), 9.67 (s, 1H), 6.94 (s, 2H), 3.92 (s, 3H).

#### Preparation of 4, 5-dichloro-1H-pyrrole-2-carbaldehyde **II**

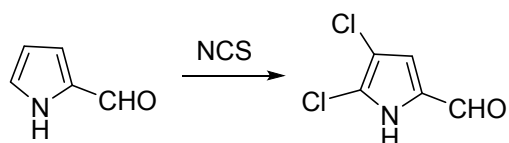

The literature procedure was followed with some modification.<sup>6</sup> To a stirred solution of pyrrole-2-carboxaldehyde (0.95 g, 10 mmol) in acetonitrile (100 mL), NCS (3.34 g, 25 mmol) was added and the resulting solution was stirred 24 h at 50 °C. Then, the solvent was evaporated, and the residue was partitioned between water (100 mL) and DCM (100 mL). The aqueous layer was separated and extracted with DCM (2 × 50 mL). The combined extracts were washed with water (20 mL), dried with Na<sub>2</sub>SO<sub>4</sub> and the solvents evaporated. The residue was purified by column chromatography (silica gel, hexane/EA = 9:1) affording **II** as white solid (1.18g, 72 %). <sup>1</sup>H NMR (400 MHz, CDCl<sub>3</sub>) δ 10.47 (s, 1H), 9.36 (s, 1H), 6.92 (s, 1H).

#### General Procedure for the Preparation of compounds **3a-3l** and **5a-5c**.

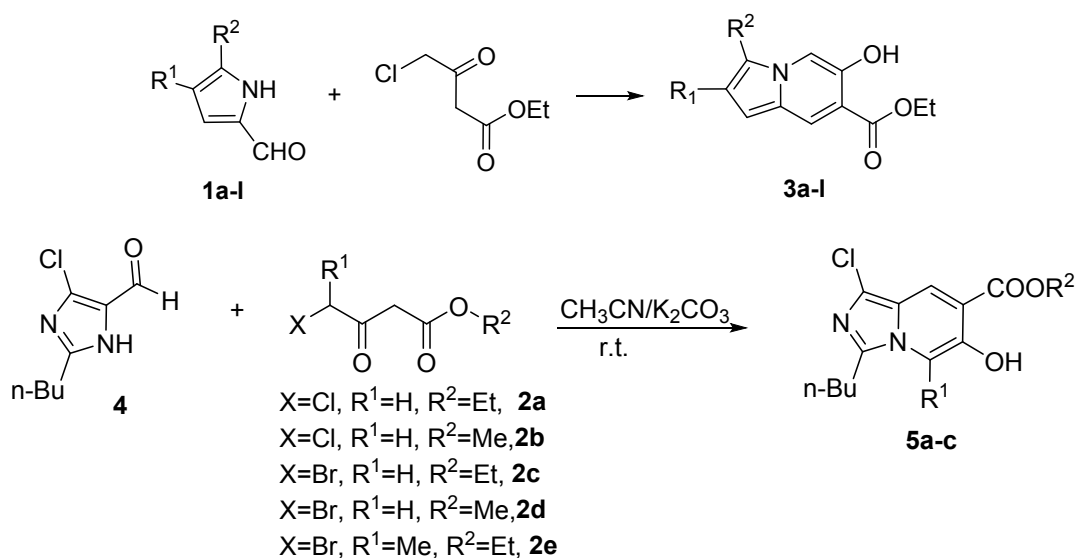

To a stirred solution of substituted pyrrole-2-carboxaldehyde **1** or 2-butyl-4-



chloro-1*H*-imidazole-5-carbaldehyde **4** (1 mmol) in acetonitrile (15 mL), K<sub>2</sub>CO<sub>3</sub> (0.42 g, 3 mmol) and 4-halogenated acetoacetic ester **2** (2 mmol) were added and the resulting solution was stirred 6 h at r.t. After the reaction was completed, the mixture was poured into water (100 mL) and extracted with dichloromethane (3×30 mL). The combined extracts were washed with water, dried over anhydrous Na<sub>2</sub>SO<sub>4</sub> and filtered. The solvent was removed by rotary evaporation. The crude products were purified by column chromatography (silica gel, hexane/EA = 20:1) to afford compounds **3a-3l** and **5a-5c**.

*ethyl 6-hydroxy-2-propionylindolizine-7-carboxylate(3a)*

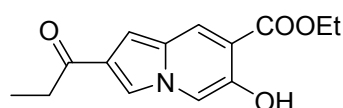

Yellow solid (70% yield). mp: 102-105 °C; <sup>1</sup>H NMR (400 MHz, CDCl<sub>3</sub>) δ 9.77 (s, 1H), 8.15 (s, 1H), 7.80 (s, 1H), 7.59 (s, 1H), 7.08 (s, 1H), 4.43 (q, *J* = 7.2 Hz, 2H), 2.93 (q, *J* = 7.2 Hz, 2H), 1.45 (t, *J* = 7.2 Hz, 3H), 1.23 (t, *J* = 7.2 Hz, 3H); <sup>13</sup>C NMR (100 MHz, CDCl<sub>3</sub>) δ 197.3, 168.6, 146.3, 129.5, 128.9, 125.0, 116.8, 110.4, 109.0, 105.6, 61.9, 33.2, 14.2, 8.4; HRMS: *m/z* calcd for [M+H]<sup>+</sup> 262.1079, found 262.1073.

*ethyl 2-acetyl-6-hydroxyindolizine-7-carboxylate (3b)*

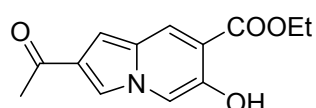

Yellow solid (72% yield). mp: 103-106 °C; <sup>1</sup>H NMR (400 MHz, CDCl<sub>3</sub>) δ 9.73 (s, 1H), 8.08 (s, 1H), 7.72 (s, 1H), 7.52 (s, 1H), 7.01 (s, 1H), 4.37 (q, *J* = 7.2 Hz, 2H), 2.48 (s, 3H), 1.38 (t, *J* = 7.2 Hz, 3H); <sup>13</sup>C NMR (100 MHz, CDCl<sub>3</sub>) δ 193.3, 167.5, 145.3, 128.8, 127.9, 124.0, 116.0, 109.5, 107.9, 104.8, 60.9, 28.7, 13.2; HRMS: *m/z* calcd for [M+H]<sup>+</sup> 248.0923, found 248.0918.

*ethyl 2-benzoyl-6-hydroxyindolizine-7-carboxylate (3c)*

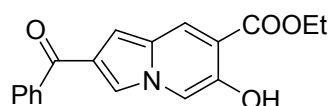

Yellow solid (65% yield). mp: 107-110 °C; <sup>1</sup>H NMR (400 MHz, CDCl<sub>3</sub>) δ 9.72 (s, 1H), 8.11 (s, 1H), 7.84 (d, *J* = 8.0 Hz, 2H), 7.74 (s, 1H), 7.54 (s, 1H), 7.51 (d, *J* = 6.8 Hz, 2H), 7.44 (t, *J* = 7.2 Hz, 2H), 7.06 (s, 1H), 4.37 (q, *J* = 7.2 Hz, 2H), 1.38 (t, *J* = 7.2 Hz, 3H); <sup>13</sup>C NMR (100 MHz, CDCl<sub>3</sub>) δ 191.2, 168.6, 146.4, 139.1, 132.1, 129.3, 128.8, 128.6, 128.4, 125.1, 118.8, 110.6, 108.9, 107.8, 61.9, 14.2; HRMS: *m/z* calcd for [M+H]<sup>+</sup> 310.1079, found 310.1077.

*7-ethyl 2-methyl 6-hydroxyindolizine-2,7-dicarboxylate (3d)*

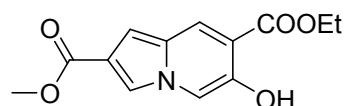

Yellow solid (69% yield). mp: 105-108 °C; <sup>1</sup>H NMR (400 MHz, CDCl<sub>3</sub>) δ 9.76 (s, 1H), 8.13 (s, 1H), 7.80 (s, 1H), 7.59 (s, 1H), 7.11 (s, 1H), 4.43 (q, *J* = 7.2 Hz, 2H), 3.88 (s, 3H), 1.44 (t, *J* = 6.8 Hz, 3H); <sup>13</sup>C NMR (100 MHz, CDCl<sub>3</sub>) δ 168.6, 164.8, 146.1, 128.6, 124.7, 121.2, 117.8, 110.2, 108.9, 106.8, 61.9, 51.6, 14.2; HRMS: *m/z* calcd for [M+H]<sup>+</sup> 264.0872, found 264.0868.

*ethyl 2-formyl-6-hydroxyindolizine-7-carboxylate (3e)*

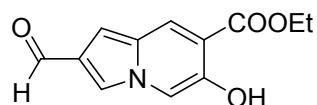

Yellow solid (75% yield). mp: 100-103 °C; <sup>1</sup>H NMR (400 MHz, CDCl<sub>3</sub>) δ 10.03 (s, 1H), 9.81 (s, 1H), 8.19 (s, 1H), 7.82 (s, 1H), 7.62 (s, 1H), 7.12 (s, 1H), 4.44 (q, *J* = 7.2 Hz, 2H), 1.45 (t, *J* = 6.8 Hz, 3H); <sup>13</sup>C NMR (100 MHz, CDCl<sub>3</sub>) δ 186.7, 168.5, 146.6, 129.6, 129.4, 125.3, 117.9, 110.1, 109.2, 106.1, 62.0, 14.2; HRMS: *m/z* calcd for [M+H]<sup>+</sup> 234.0766, found 234.0761.

*ethyl 2-bromo-6-hydroxyindolizine-7-carboxylate (3f)*

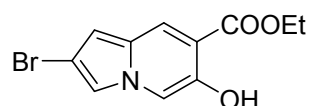

Yellow solid (60% yield). mp: 110-113 °C; <sup>1</sup>H NMR (400 MHz, CDCl<sub>3</sub>) δ 9.72 (s, 1H), 8.02(s, 1H), 7.58 (s, 1H), 7.34 (s, 1H), 6.70 (s, 1H), 4.42 (q, *J* = 7.2 Hz, 2H), 1.44 (t, *J* = 7.2 Hz, 3H); <sup>13</sup>C NMR (100 MHz, CDCl<sub>3</sub>) δ 168.5, 145.5, 128.8, 121.8, 115.2, 109.1, 108.6, 106.5, 104.3, 61.7, 14.2; HRMS: *m/z* calcd for [M]<sup>+</sup> 282.9844, found 282.2790.

*ethyl 6-hydroxy-2-iodoindolizine-7-carboxylate (3g)*

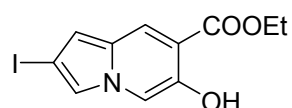

Yellow solid (55% yield). mp: 106-108 °C; <sup>1</sup>H NMR (400 MHz, CDCl<sub>3</sub>) δ 9.70 (s, 1H), 8.02 (s, 1H), 7.58 (s, 1H), 7.38 (s, 1H), 6.81 (s, 1H), 4.42 (q, *J* = 6.8 Hz, 2H), 1.43 (t, *J* = 6.8 Hz, 3H); <sup>13</sup>C NMR (100 MHz, CDCl<sub>3</sub>) δ 168.5, 145.4, 130.2, 121.4, 119.8, 112.0, 109.0, 108.2, 61.7, 14.2; HRMS: *m/z* calcd for [M+H]<sup>+</sup> 330.9705, found 330.9700.

*ethyl 6-hydroxy-2-nitroindolizine-7-carboxylate (3h)*

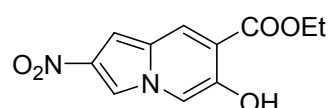

Yellow solid (74% yield). mp: 135-137 °C; <sup>1</sup>H NMR (400 MHz, CDCl<sub>3</sub>) δ 9.82 (s, 1H), 8.10 (s, 1H), 7.92 (s, 1H), 7.54 (s, 1H), 7.15 (s, 1H), 4.39 (q, *J* = 7.2 Hz, 2H), 1.39 (t, *J* = 7.2 Hz, 3H); <sup>13</sup>C NMR (100 MHz, CDCl<sub>3</sub>) δ 167.1, 146.2, 126.2, 124.2, 113.3, 111.4, 108.4, 99.8, 61.3, 13.1; HRMS: *m/z* calcd for [M+H]<sup>+</sup> 251.0668, found 251.0663. HRMS: *m/z* calcd for [M+H]<sup>+</sup> 251.0668, found 251.0663.

*ethyl 6-hydroxy-3-nitroindolizine-7-carboxylate (3i)*

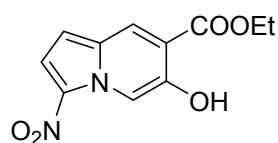

Yellow solid (66% yield). mp: 136-140 °C; <sup>1</sup>H NMR (400 MHz, CDCl<sub>3</sub>) δ 10.09 (s, 1H), 9.44 (s, 1H), 8.24 (s, 1H), 7.73 (d, *J* = 5.2 Hz, 1H), 6.76 (d, *J* = 5.2 Hz, 1H), 4.51 (q, *J* = 7.2 Hz, 2H), 1.48 (t, *J* = 6.8 Hz, 3H); <sup>13</sup>C NMR (100 MHz, CDCl<sub>3</sub>) δ 167.8, 149.9, 132.3, 121.5, 118.1, 114.3, 107.0, 62.8, 14.2;

*diethyl 6-hydroxyindolizine-3,7-dicarboxylate (3j)*

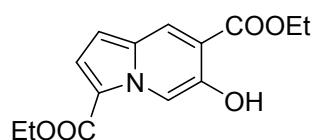

Yellow solid (66% yield). mp: 122-125 °C; <sup>1</sup>H NMR (400 MHz, CDCl<sub>3</sub>) δ 9.77 (s, 1H), 9.20 (s, 1H), 8.16 (s, 1H), 7.46 (d, *J* = 4.0 Hz, 1H), 6.68 (d, *J* = 4.0 Hz, 1H), 4.46 (q, *J* = 7.2 Hz, 2H), 4.40 (q, *J* = 6.8 Hz, 2H), 1.45 (t, *J* = 7.2 Hz, 3H), 1.41 (t, *J* = 6.8 Hz, 3H); <sup>13</sup>C NMR (100 MHz, CDCl<sub>3</sub>) δ 168.6, 161.1, 146.9, 132.9, 121.5, 116.5, 112.9, 111.4, 105.4, 62.0, 60.2, 14.6, 14.2; HRMS: *m/z* calcd for [M+H]<sup>+</sup> 278.1028, found 278.1025.

*7-ethyl 3-methyl 6-hydroxyindolizine-3,7-dicarboxylate (3k)*

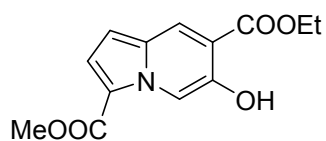

Yellow solid (70% yield). mp: 107-109 °C; <sup>1</sup>H NMR (400 MHz, CDCl<sub>3</sub>) δ 9.70 (s, 1H), 9.12 (s, 1H), 8.09 (s, 1H), 7.37 (d, *J* = 4.8 Hz, 1H), 6.60 (d, *J* = 4.8 Hz, 1H), 4.34 (q, *J* = 7.2 Hz, 2H), 3.85 (s, 3H), 1.38 (t, *J* = 7.2 Hz, 3H); <sup>13</sup>C NMR (100 MHz, CDCl<sub>3</sub>) δ 167.5, 160.4, 146.0, 131.9, 120.5, 120.4, 115.1, 111.9, 110.5, 104.5, 61.0, 50.3, 13.2; HRMS: *m/z* calcd for [M+H]<sup>+</sup> 264.0872, found 264.0867.

*ethyl 2,3-dichloro-6-hydroxyindolizine-7-carboxylate (3l)*

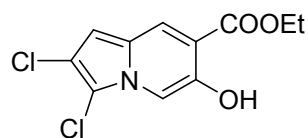

Yellow solid (62% yield). mp: 100-104 °C; <sup>1</sup>H NMR (400 MHz, CDCl<sub>3</sub>) δ 9.88 (s, 1H), 8.02 (s, 1H), 7.61 (s, 1H), 6.73 (s, 1H), 4.43 (q, *J* = 7.2 Hz, 2H), 1.44 (t, *J* = 7.2 Hz, 3H); <sup>13</sup>C NMR (100 MHz, CDCl<sub>3</sub>) δ 168.5, 146.3, 126.2, 121.9, 118.5, 106.2, 103.6, 62.1, 14.2; HRMS: *m/z* calcd for [M+H]<sup>+</sup> 274.0038, found 274.2740.

*ethyl 3-butyl-1-chloro-6-hydroxyimidazo[1,5-a]pyridine-7-carboxylate (5a)*

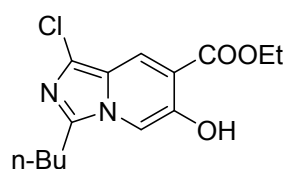

Yellow solid (2a: 63% yield; 2e: 68% yield). mp: 116-119 °C; <sup>1</sup>H NMR (400 MHz, CDCl<sub>3</sub>) δ 9.90 (s, 1H), 8.14 (s, 1H), 7.34 (s, 1H), 4.45 (q, *J* = 7.2 Hz, 2H), 2.88 (t, *J* = 7.6 Hz, 2H), 1.76-1.83(m, 2H), 1.40-1.47(m, 5H), 0.96 (t, *J* = 7.6 Hz, 3H); <sup>13</sup>C NMR (100 MHz, CDCl<sub>3</sub>) δ 168.3, 146.4, 138.9, 124.4, 122.3, 122.0, 110.0, 103.8, 62.2, 28.7, 26.4, 22.5, 14.2, 13.8; HRMS: *m/z* calcd for [M+H]<sup>+</sup> 297.1006, found 297.1010.

*methyl 3-butyl-1-chloro-6-hydroxyimidazo[1,5-a]pyridine-7-carboxylate (5b)*

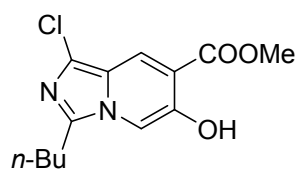

Yellow solid (2b: 68% yield; 2d: 72% yield). mp: 87-90 °C; <sup>1</sup>H NMR (400 MHz, CDCl<sub>3</sub>) δ 9.73 (s, 1H), 8.09 (s, 1H), 7.27 (s, 1H), 3.92 (s, 3H), 2.81 (t, *J* = 8.0 Hz, 2H), 1.69-1.76 (m, 2H), 1.31-1.40 (m, 2H), 0.89 (t, *J* = 7.2 Hz, 3H); <sup>13</sup>C NMR (100 MHz, CDCl<sub>3</sub>) δ 167.8, 145.2, 138.0, 123.7, 121.4, 121.0, 108.6, 102.8, 51.8, 27.6, 25.4, 21.5, 12.8; HRMS: *m/z* calcd for [M+H]<sup>+</sup> 283.0849, found 283.0852.

ethyl 3-butyl-1-chloro-6-hydroxy-5-methylimidazo[1,5-a]pyridine-7-carboxylate (**5c**)

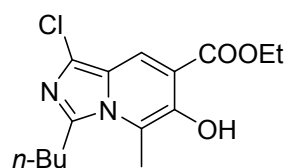

Yellow solid (66% yield). mp: 70-73 °C; <sup>1</sup>H NMR (400 MHz, CDCl<sub>3</sub>) δ 9.93 (s, 1H), 7.94 (s, 1H), 4.36 (q, *J* = 7.2 Hz, 2H), 3.18 (t, *J* = 7.6 Hz, 3H), 2.64 (s, 3H), 1.69-1.76 (m, 2H), 1.33-1.39 (m, 5H), 0.89 (q, *J* = 7.2 Hz, 3H); <sup>13</sup>C NMR (100 MHz, CDCl<sub>3</sub>) δ 167.6, 141.4, 140.1, 123.3, 122.0, 118.9, 114.6, 108.7, 61.1, 31.3, 29.1, 21.4, 13.2, 12.8, 10.8; HRMS: *m/z* calcd for [M+H]<sup>+</sup> 311.1162, found 311.1171.

## Reference

1. G. H. Barnett, H. J. Anderson and C. E. Loader, *Can. J. Chem.*, 1980, **58**, 409-411.
2. H. J. Anderson, C. E. Loader and A. Foster, *Can. J. Chem.*, 1980, **58**, 2527-2530.
3. V. K. Outlaw, F. B. d'Andrea and C. A. Townsend, *Org. Lett.*, 2015, **17**, 1822-1825.
4. J. K. Laha, S. Sharma, S. Kirar and U. C. Banerjee, *J. Org. Chem.*, 2017, **82**, 9350-9359.
5. H. H. Lee, J. B. Lee, Y. Park, K. H. Park, M. S. Okyay, D. S. Shin, S. Kim, J. Park, N. Park, B. K. An, Y. S. Jung, H. W. Lee, K. T. Lee and S. Y., *ACS Appl. Mater. Interfaces*, 2018, **10**, 22110-22118.
6. C. Santiago, I. Rubio, N. Sotomayor and E. Lete, *Eur. J. Org. Chem.* 2020, 4284-4295.

**Table S1** The optical characteristics of the compounds **3a-l** in EtOH

| compounds | $\lambda_{\text{max}}$ (nm) | $\lambda_1$ (nm) | $\lambda_2$ (nm) | $\lambda_{\text{em}}$ (nm) |
|-----------|-----------------------------|------------------|------------------|----------------------------|
| <b>3a</b> | 257                         | 290              | 395              | 540                        |
| <b>3b</b> | 256                         | 293              | 390              | 535                        |
| <b>3c</b> | 252                         | 310              | 415              | 450                        |
| <b>3d</b> | 262                         | 350              | 395              | 505                        |
| <b>3e</b> | 254                         | 340              | 405              | 425                        |
| <b>3f</b> | 242                         | 352              | 390              | 450                        |
| <b>3g</b> | 243                         | 353              | 395              | 450                        |
| <b>3h</b> | 248                         | 320              | 410              | 450                        |
| <b>3i</b> | 242                         | 320              | 445              | 455                        |
| <b>3j</b> | 250                         | 290              | 380              | 455                        |
| <b>3k</b> | 236                         | 290              | 385              | 455                        |
| <b>3l</b> | 260                         | 355              | 385              | 450                        |

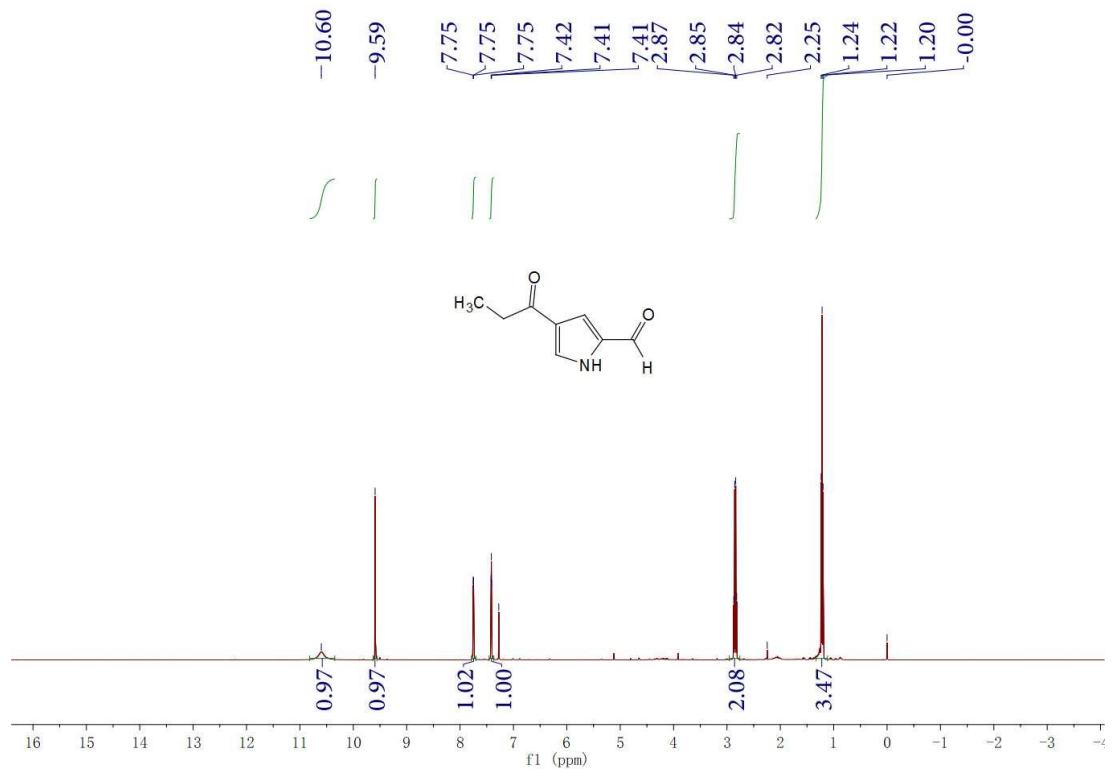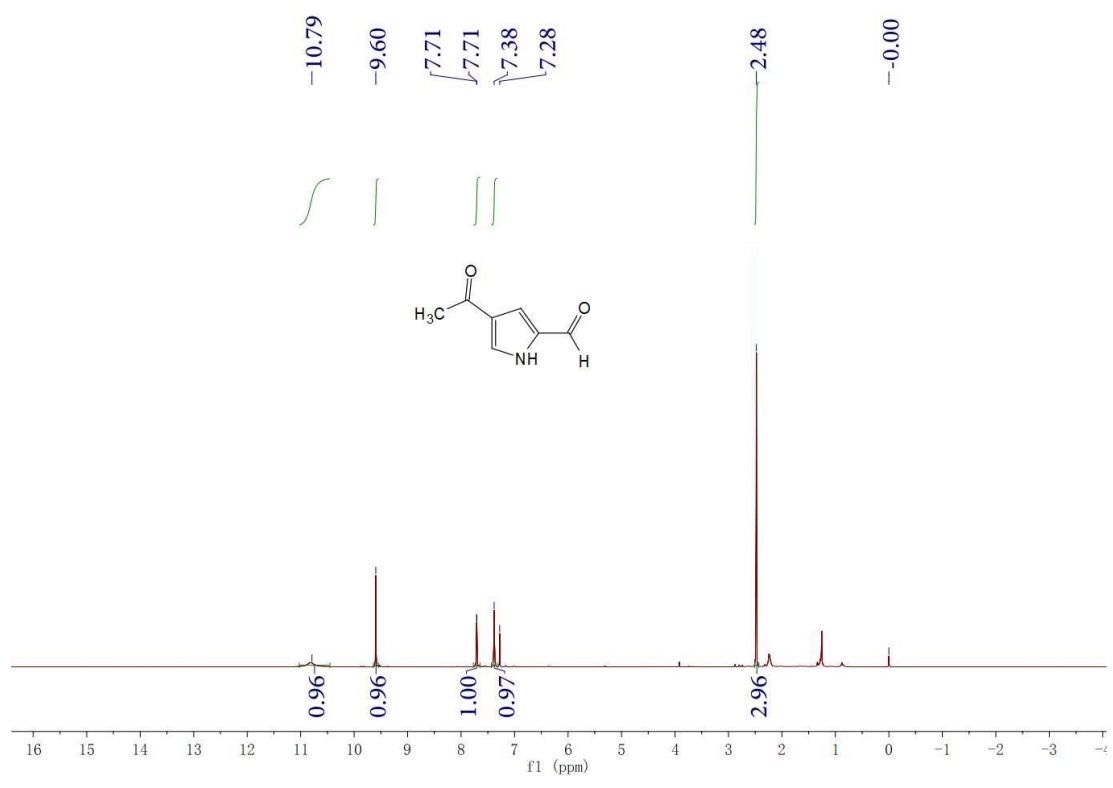



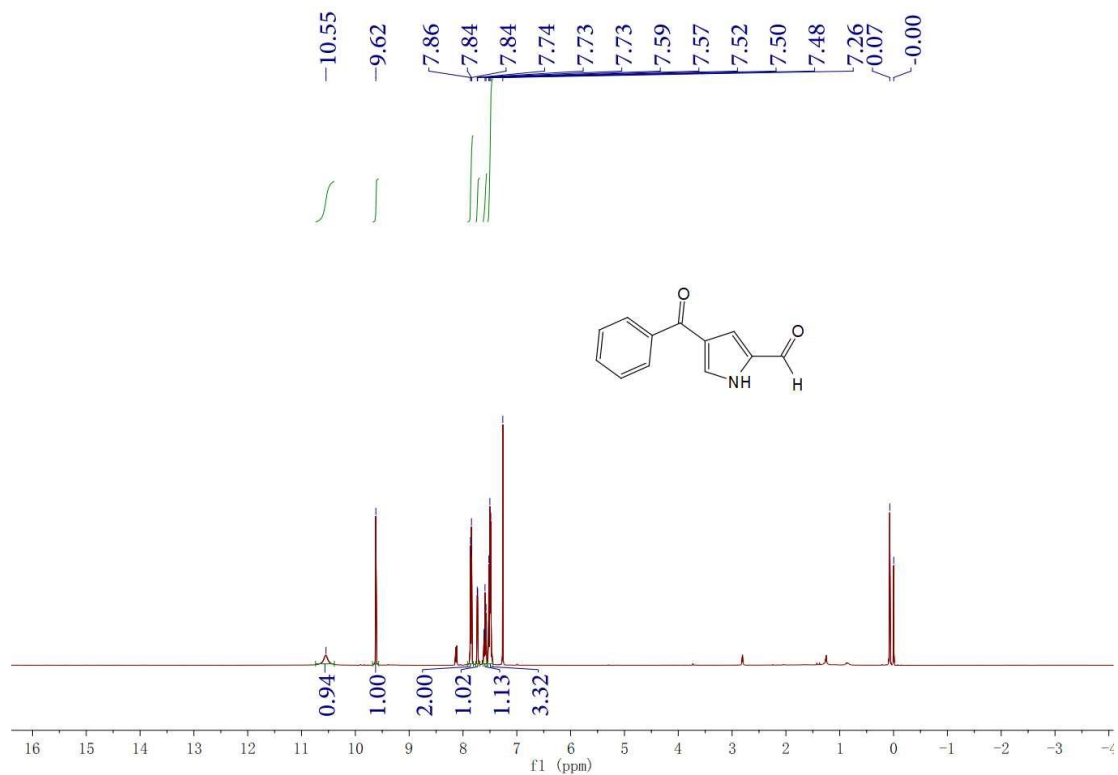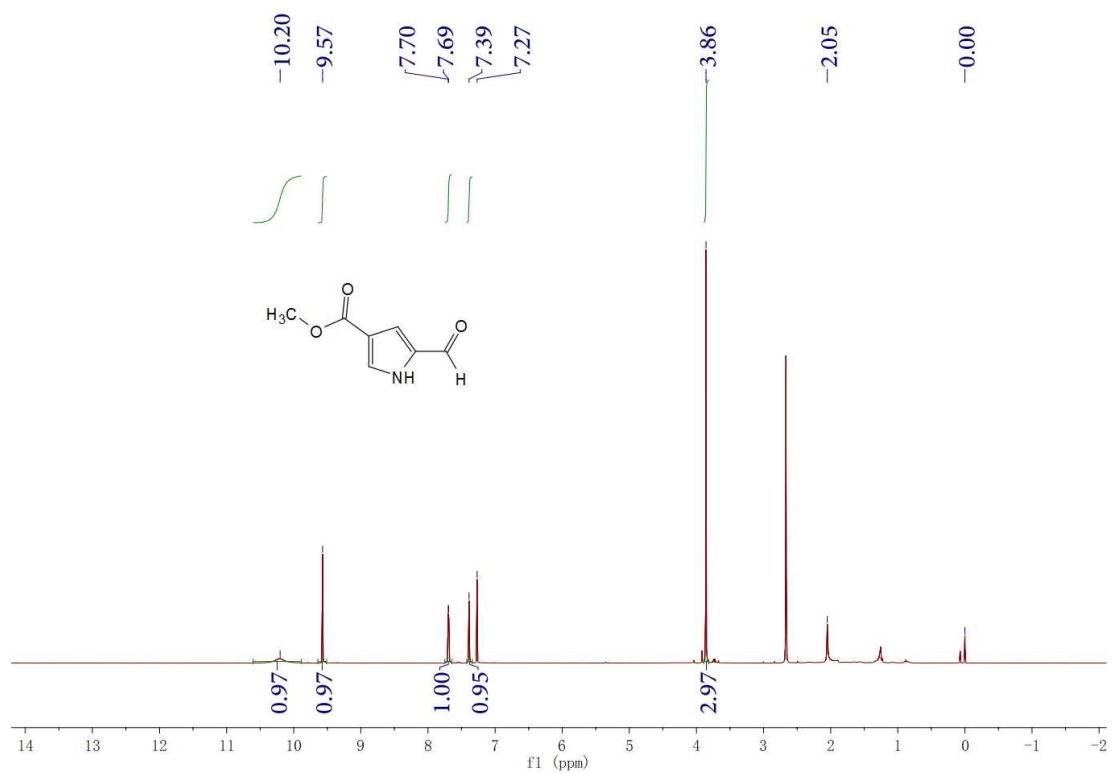

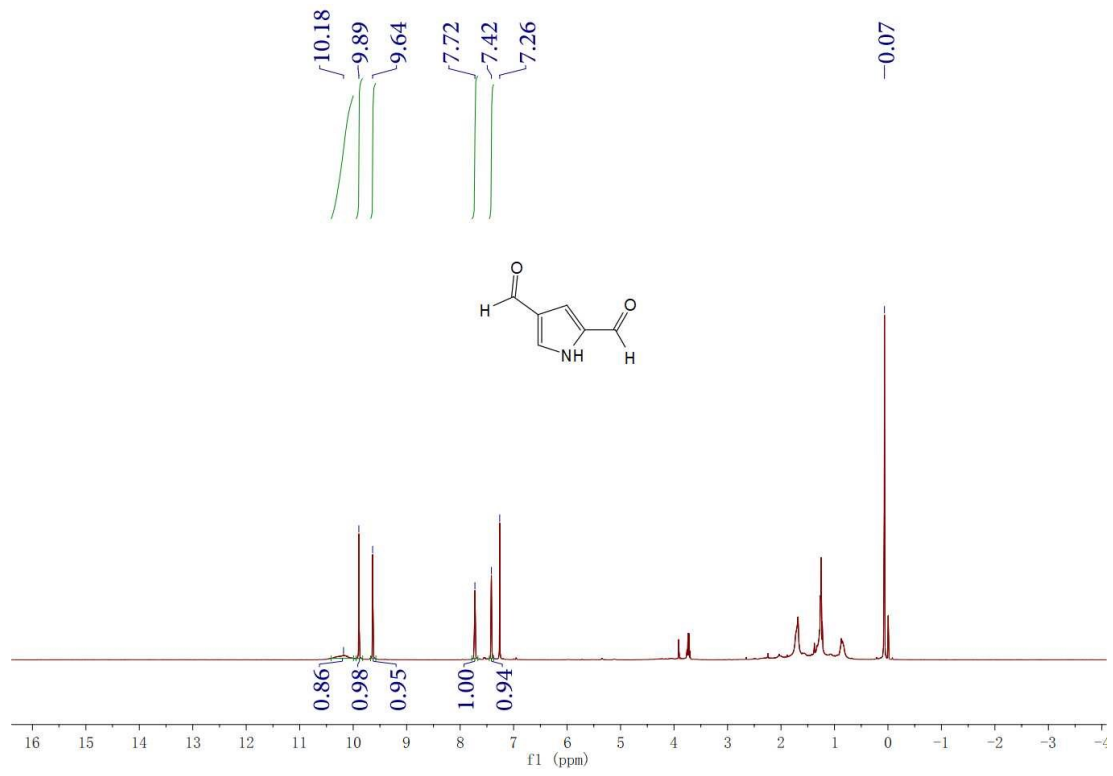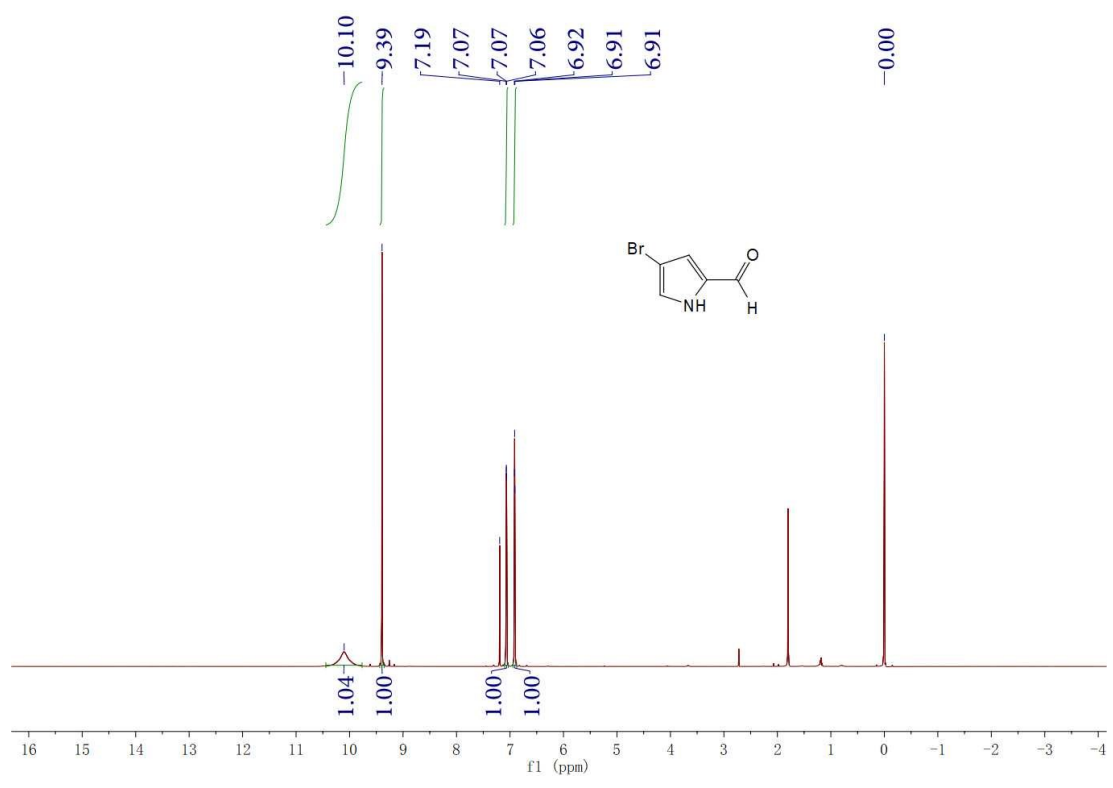

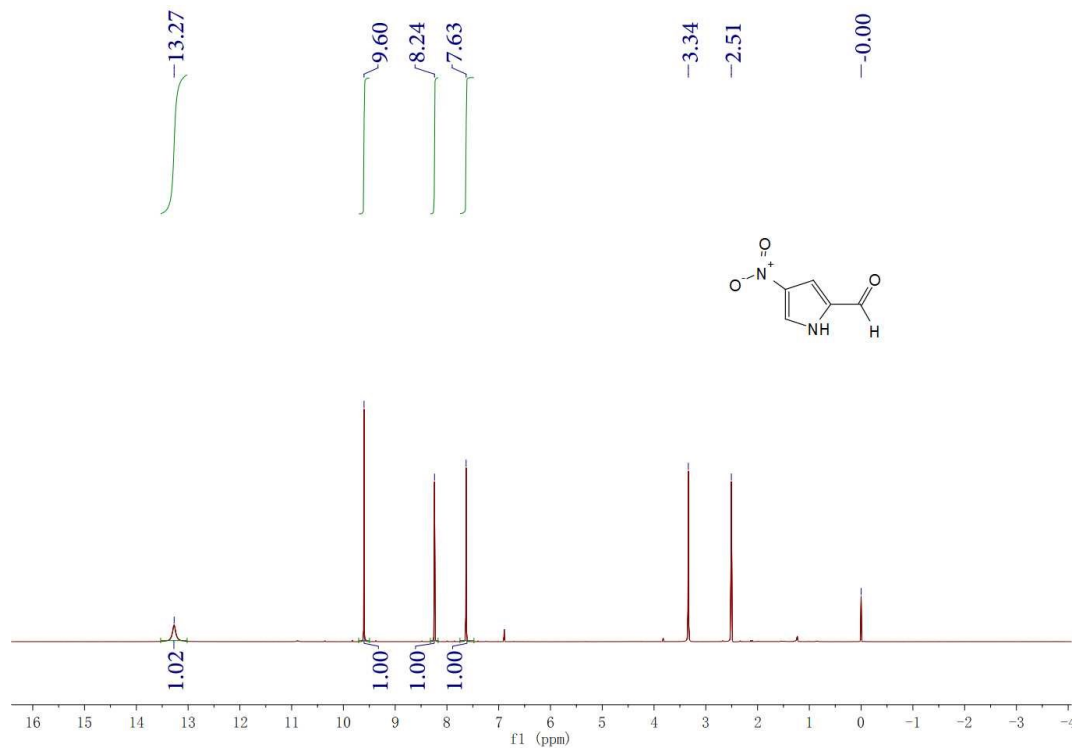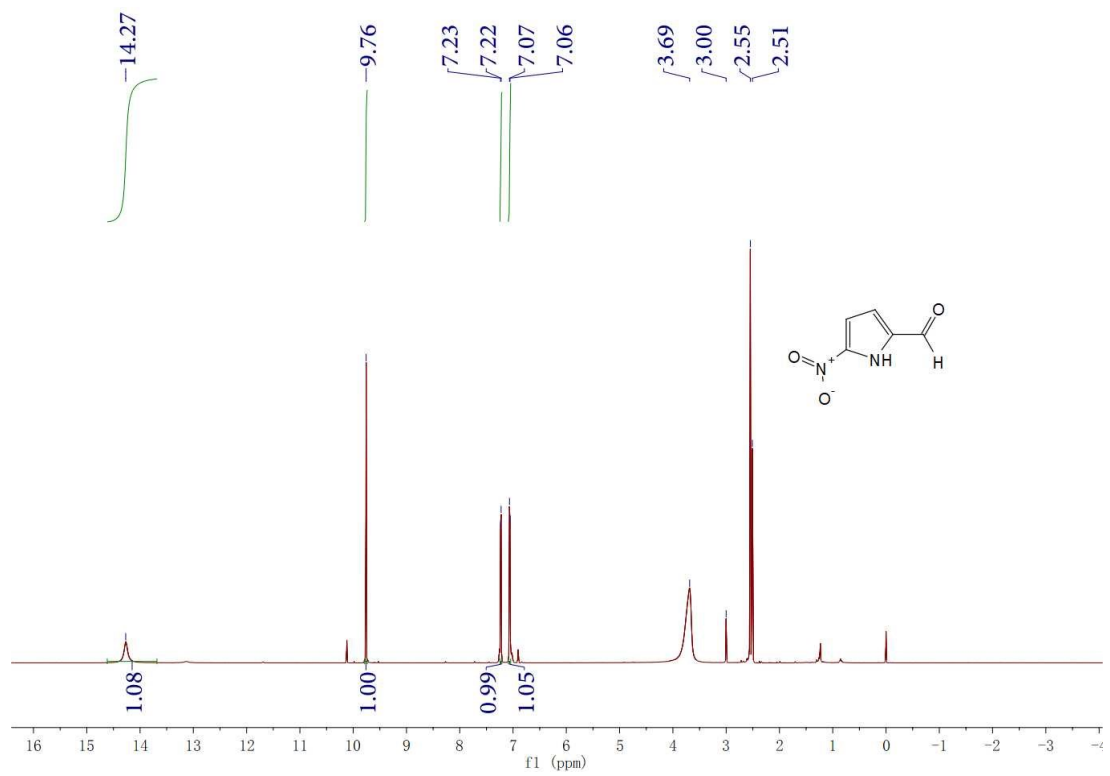

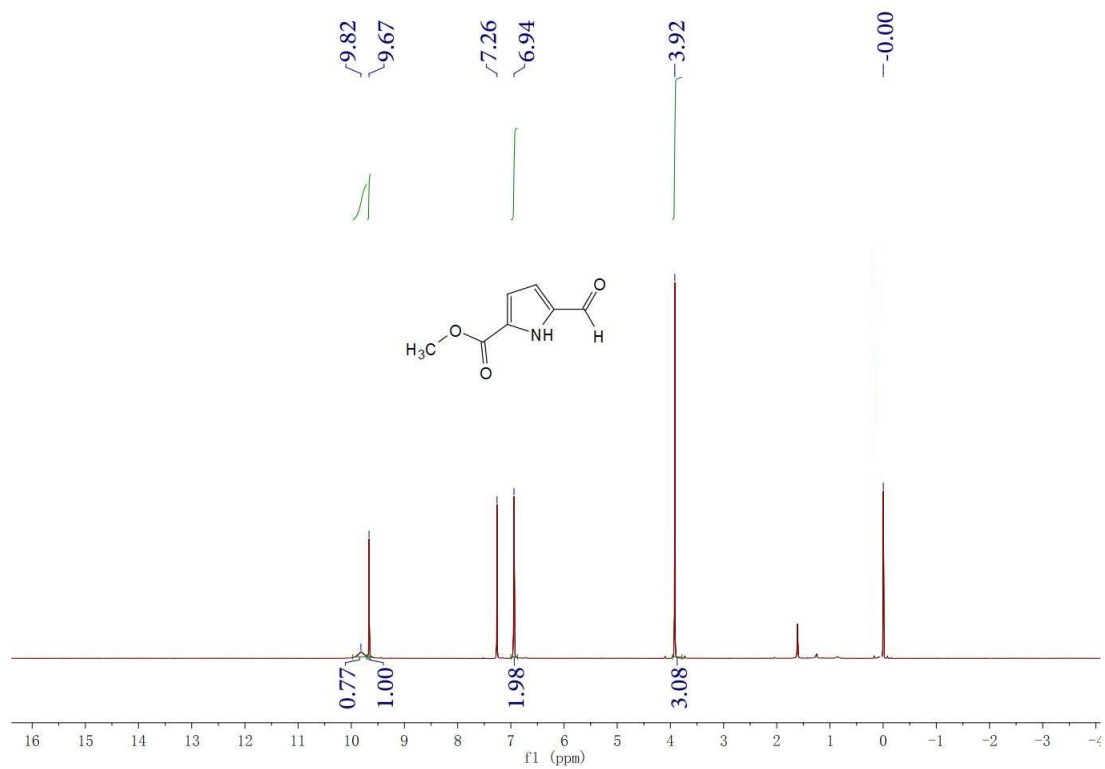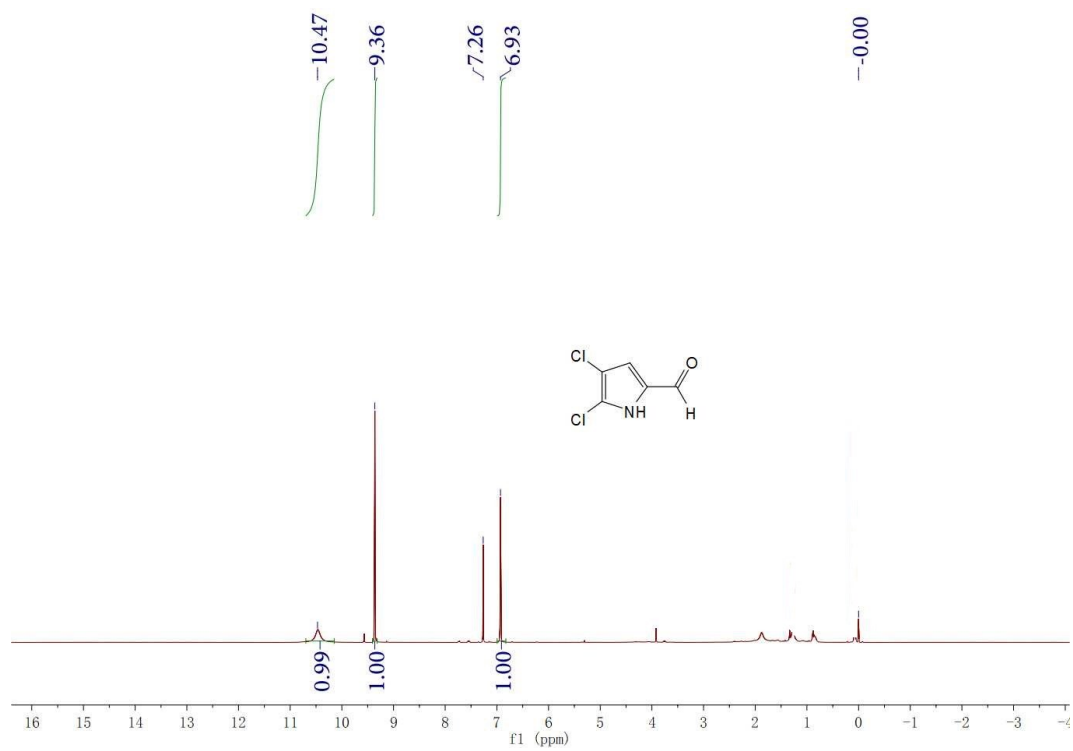

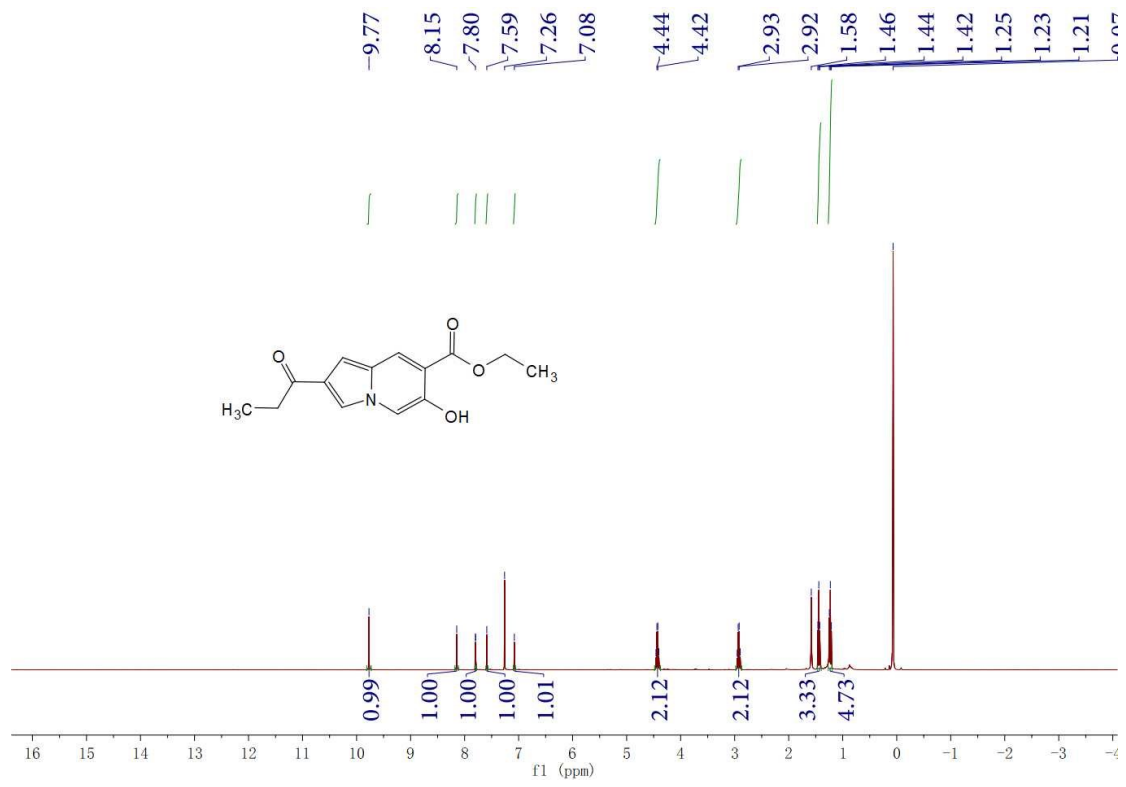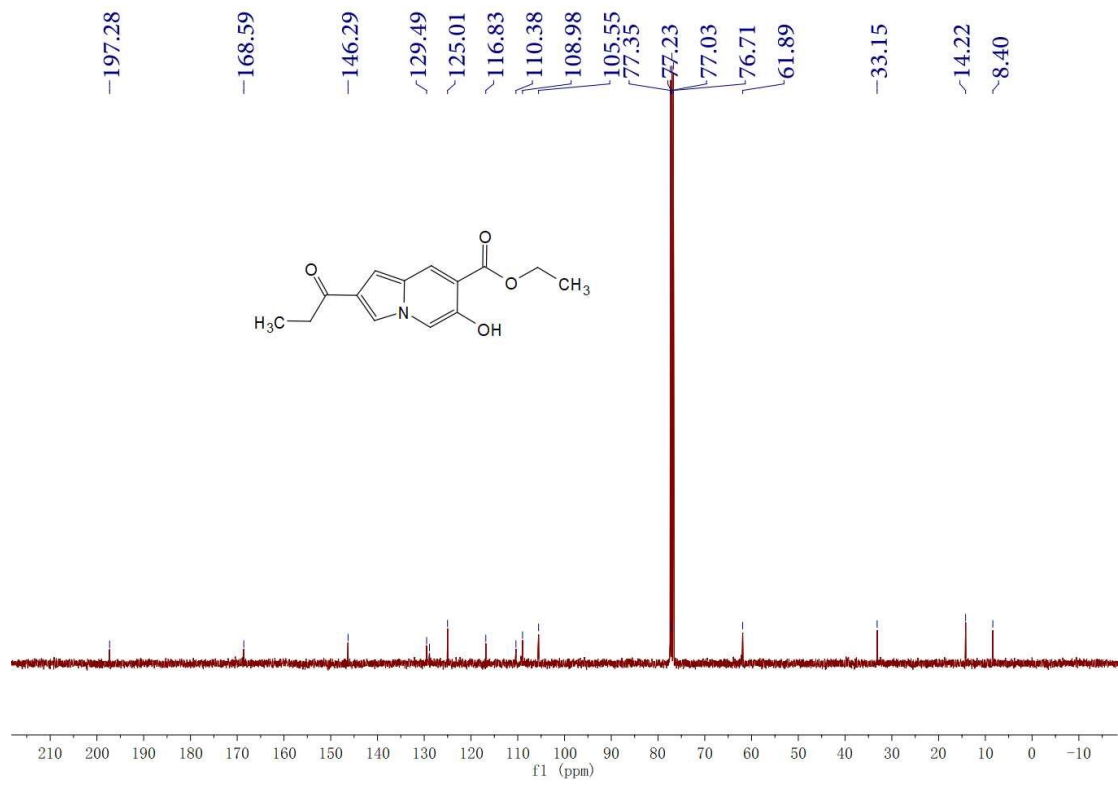

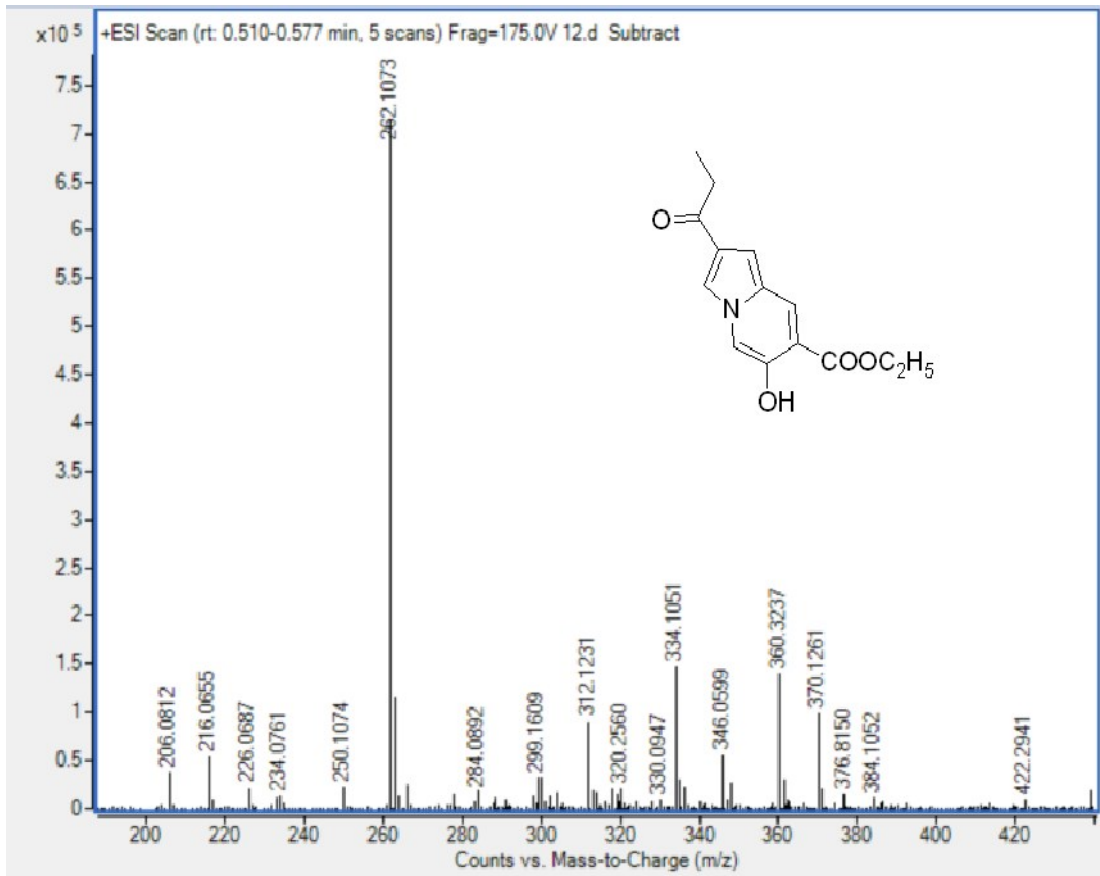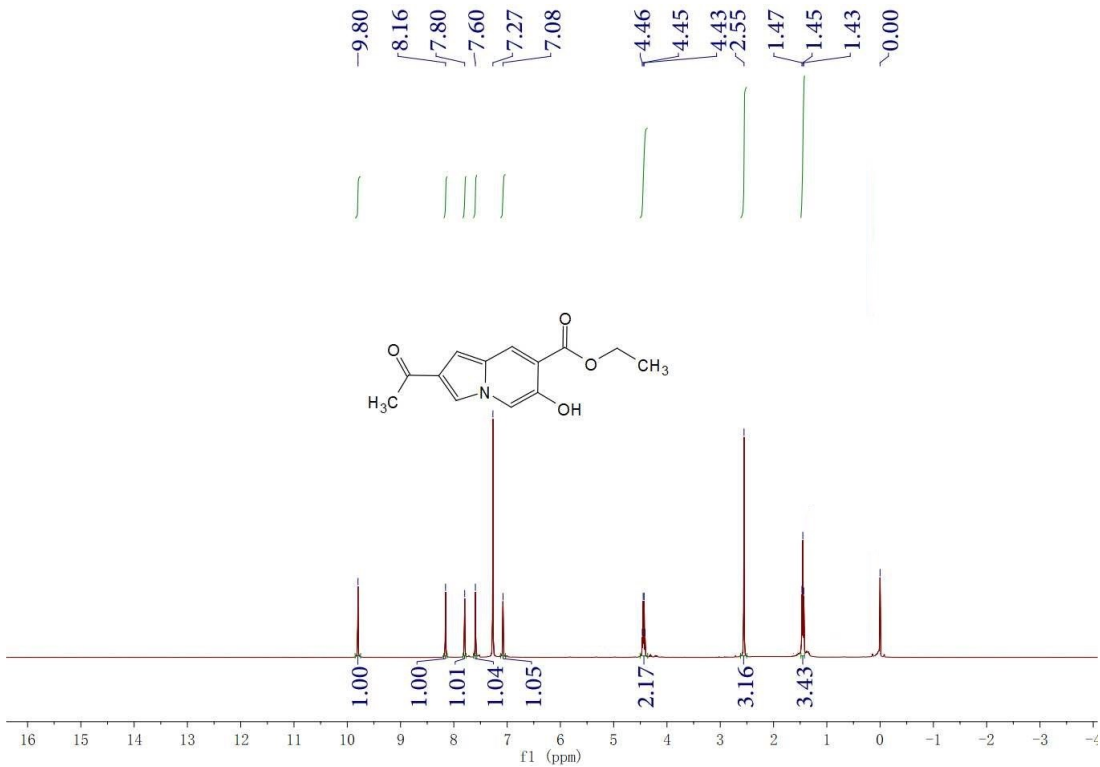

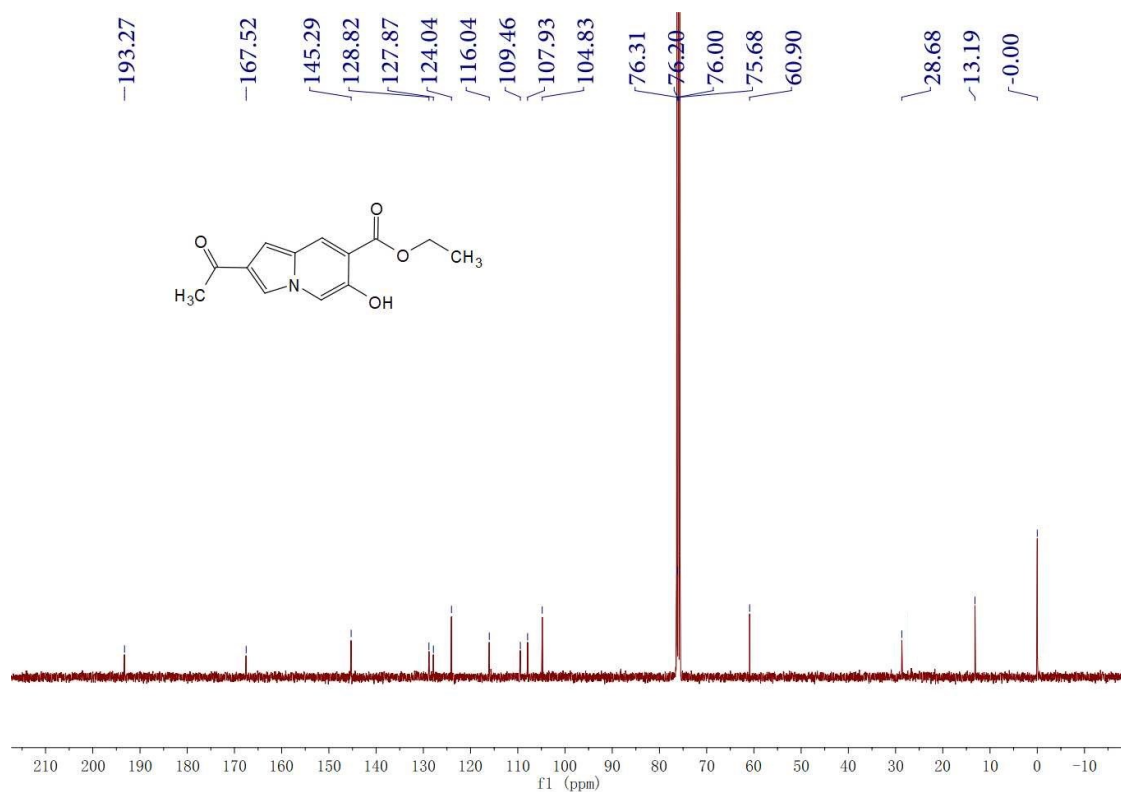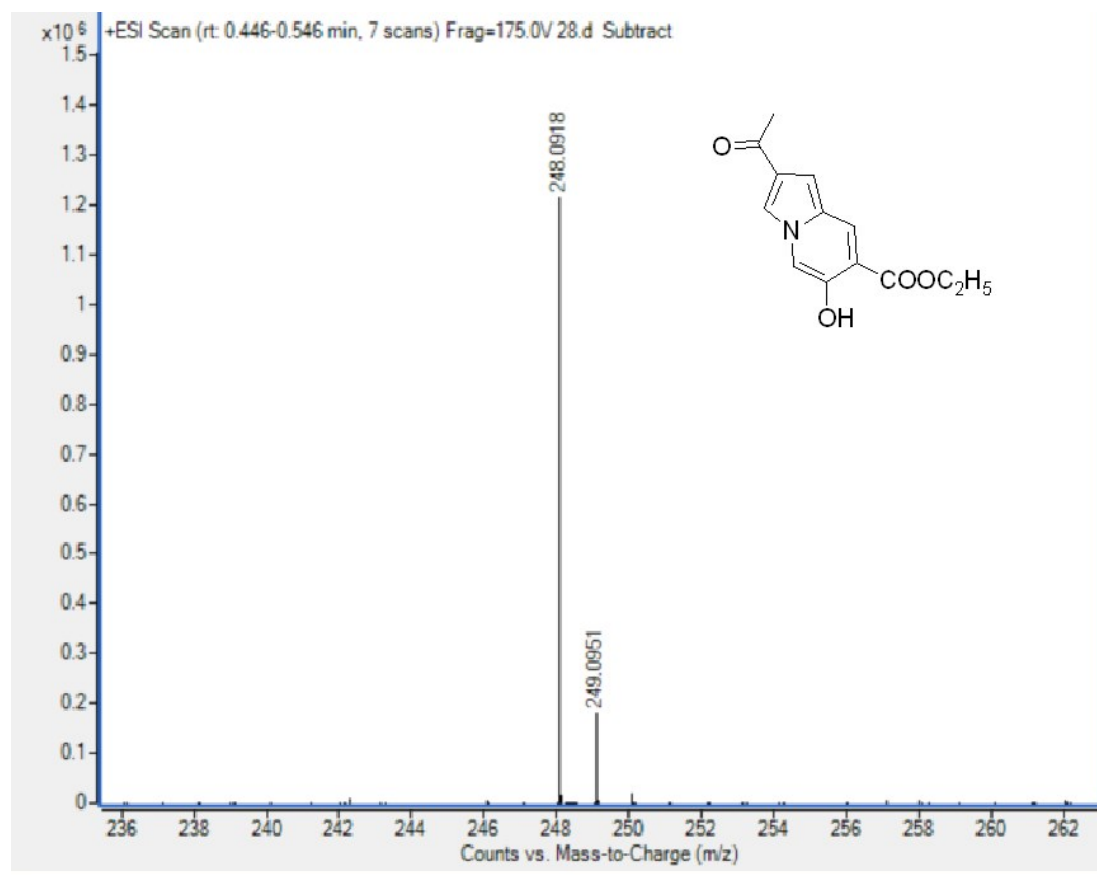

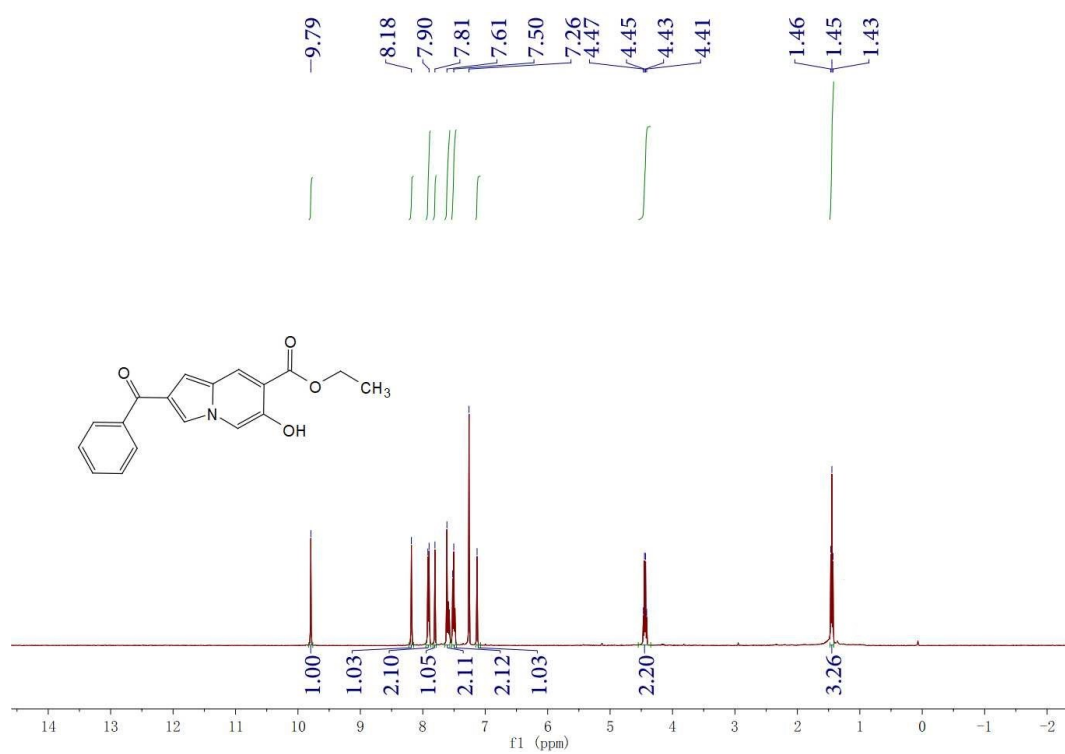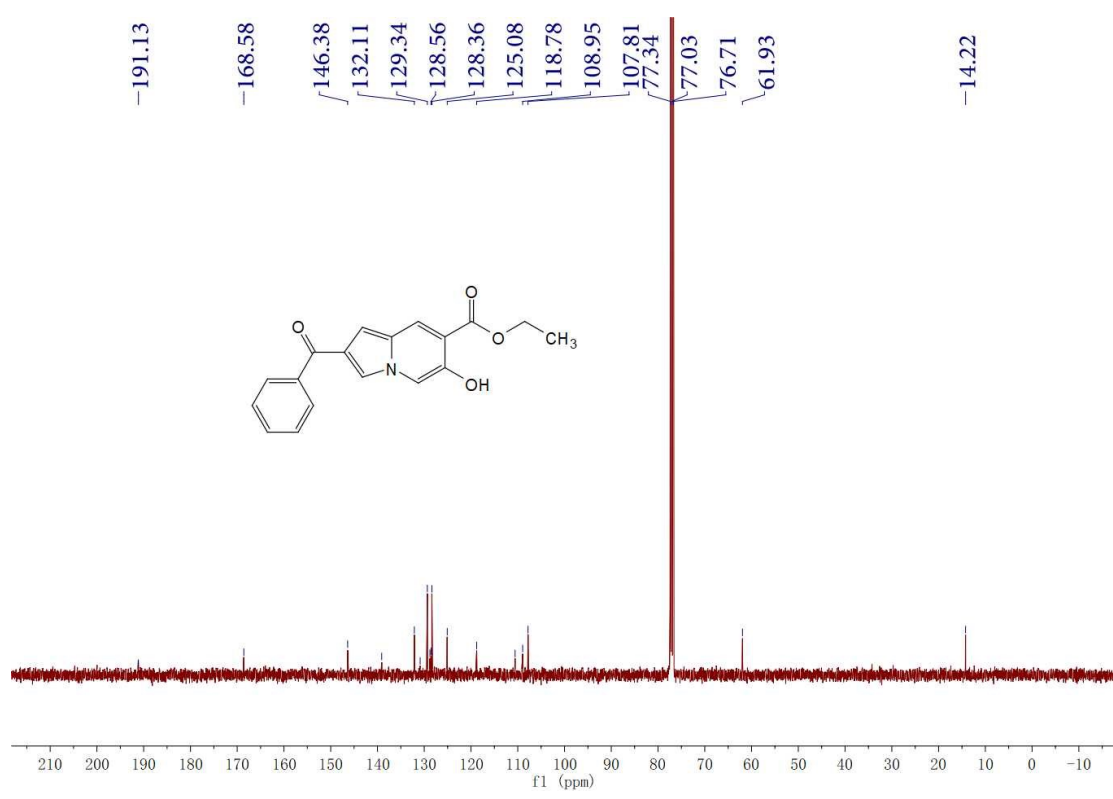



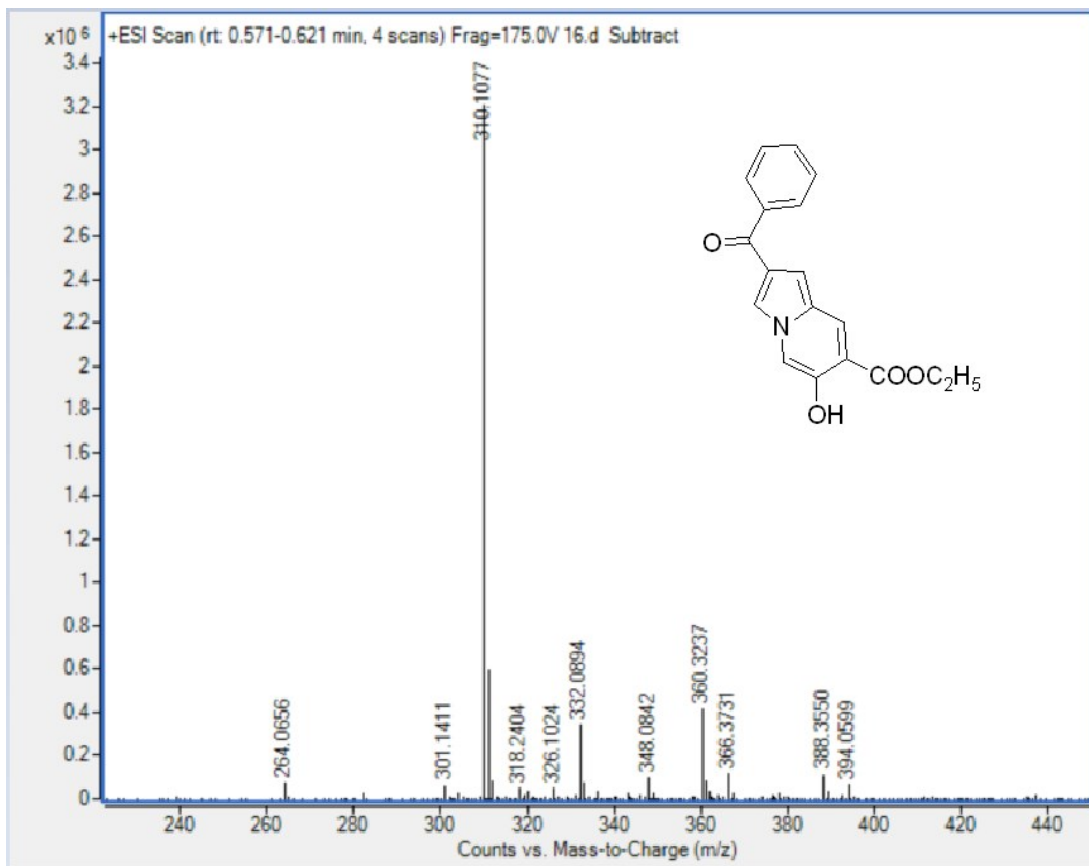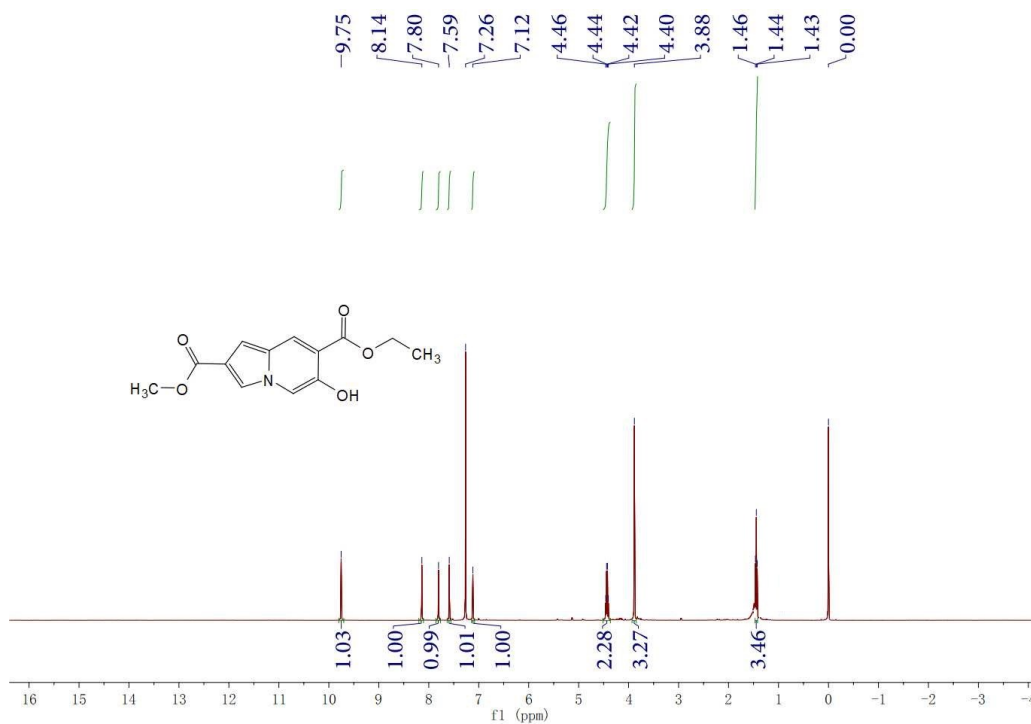

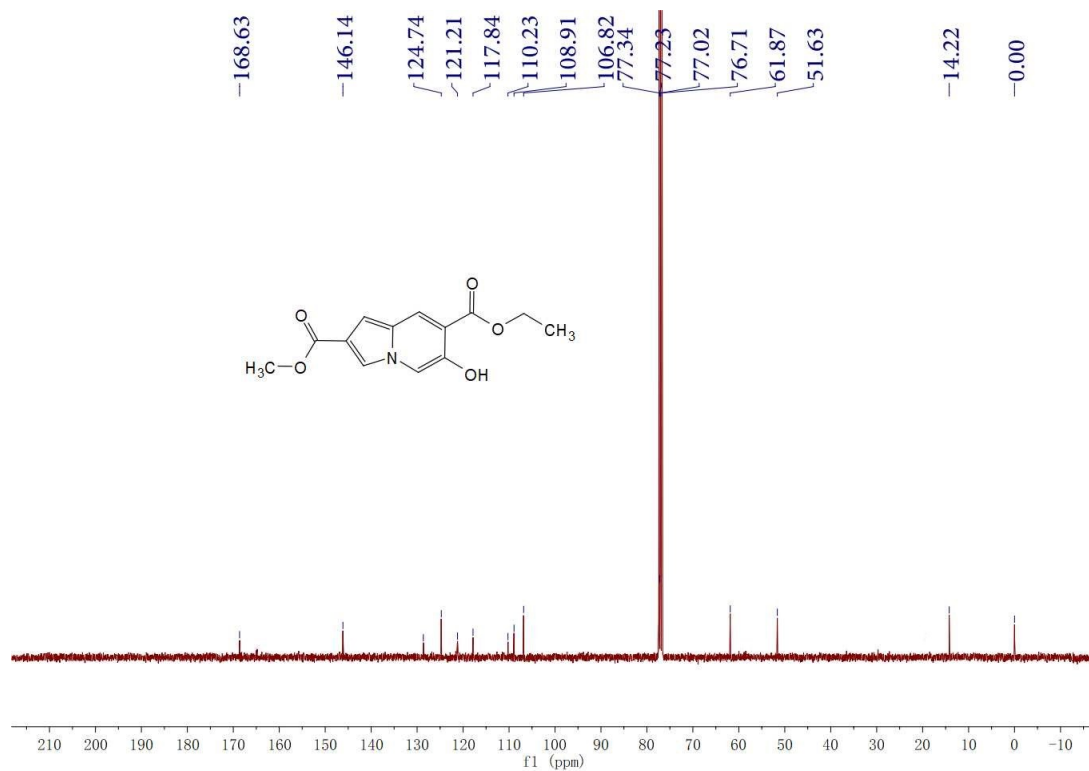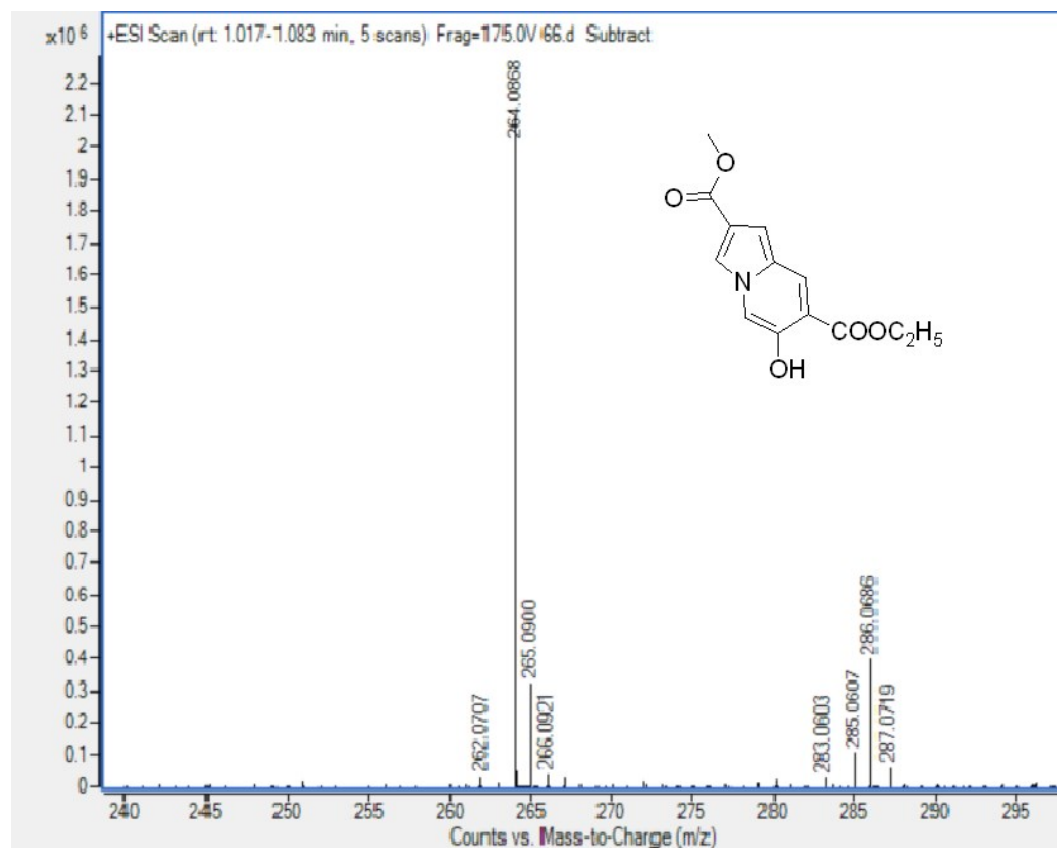

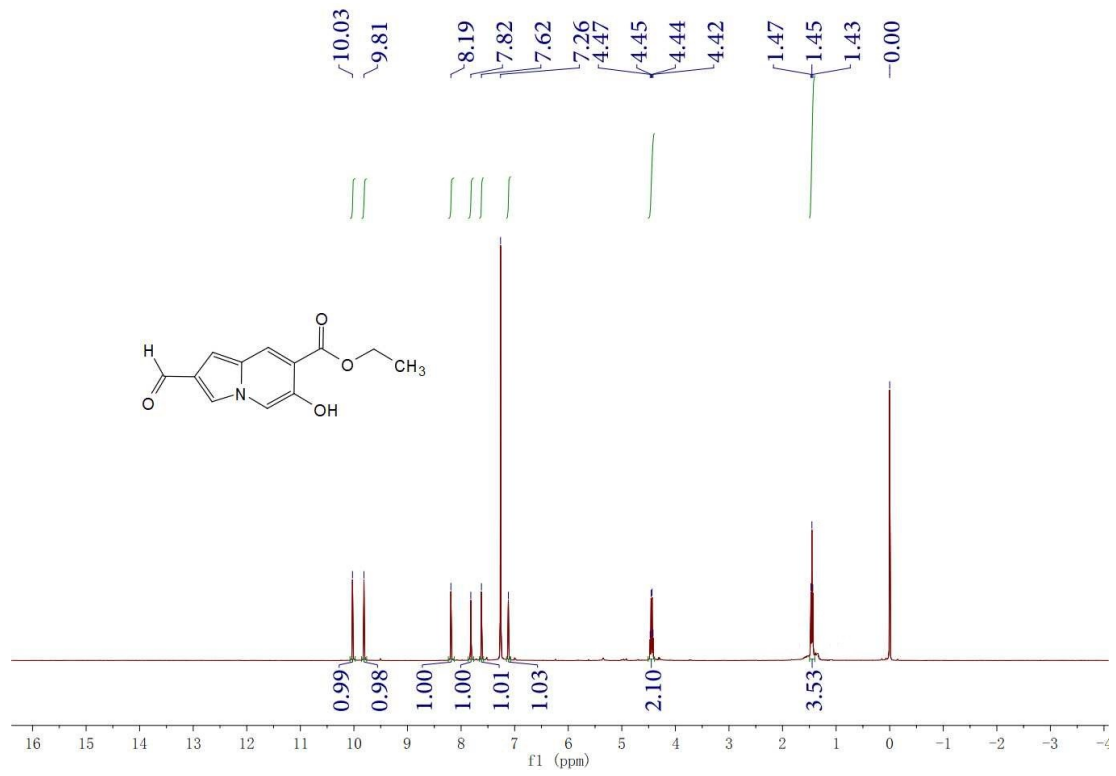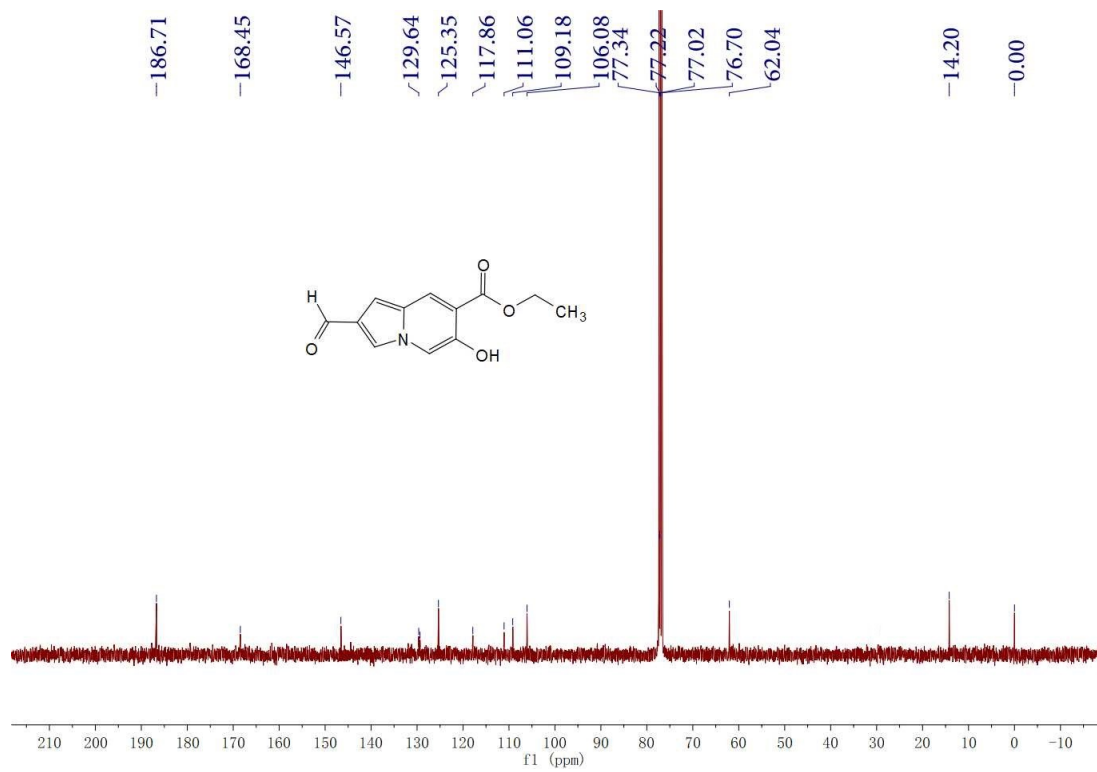

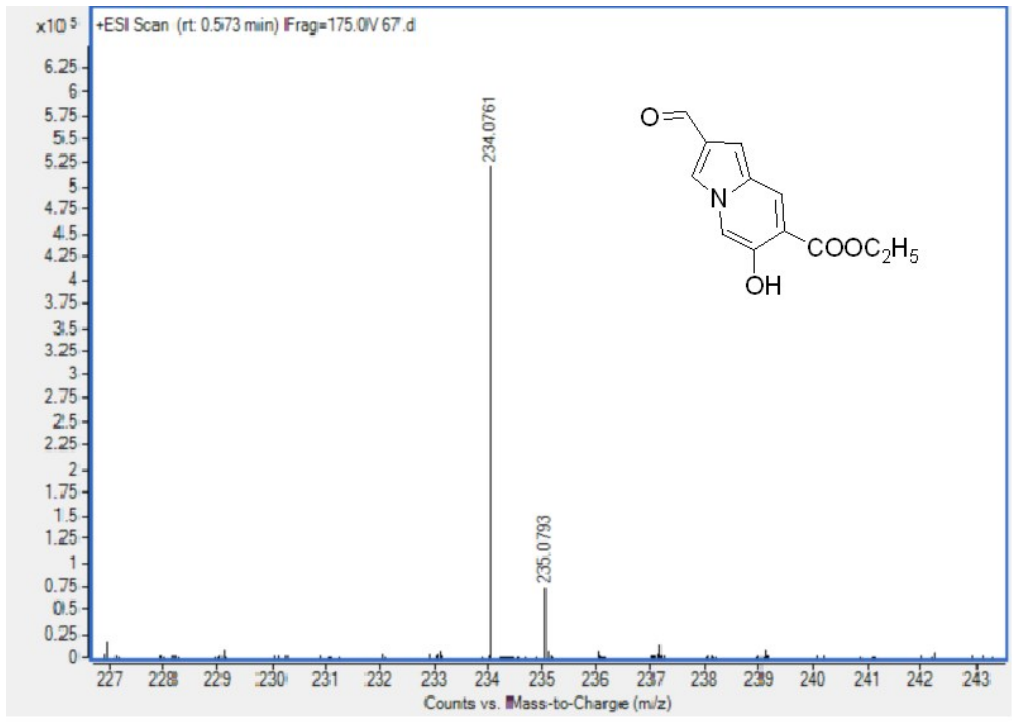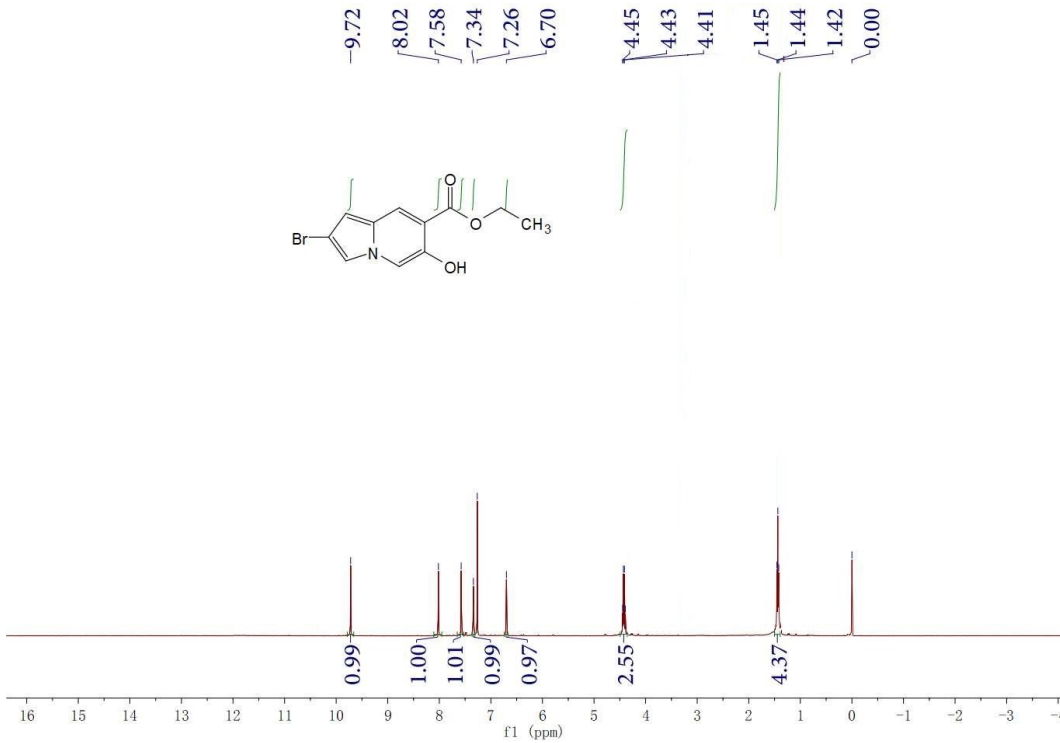

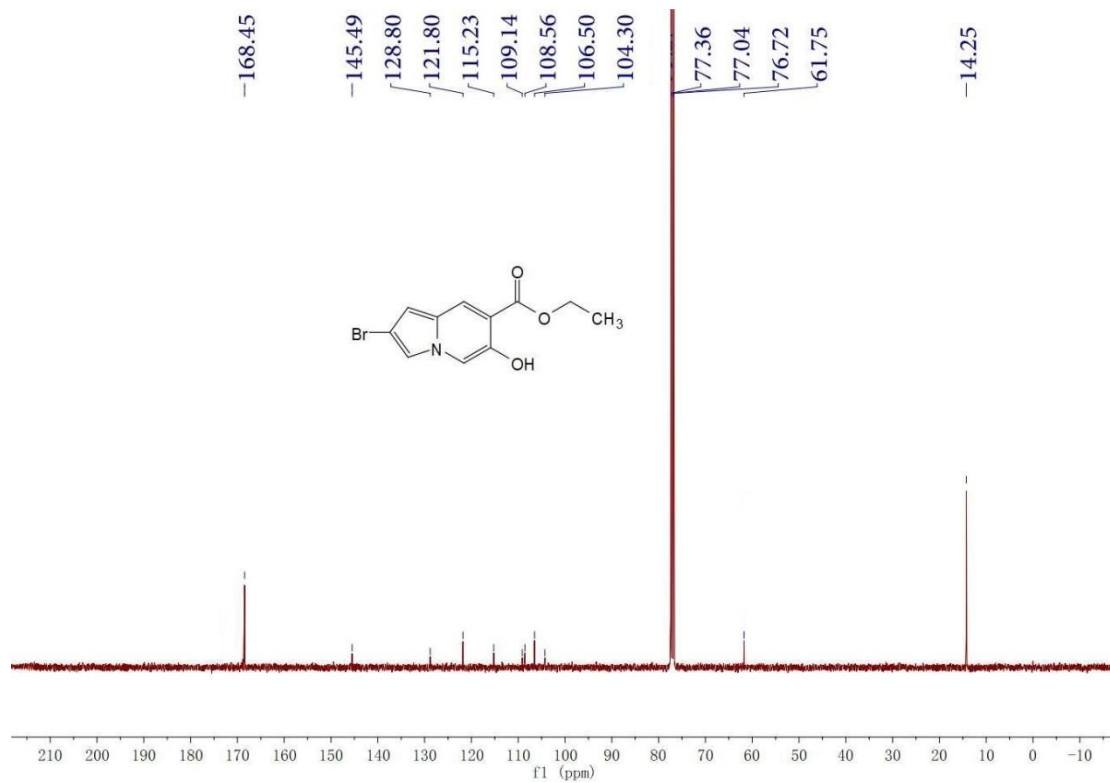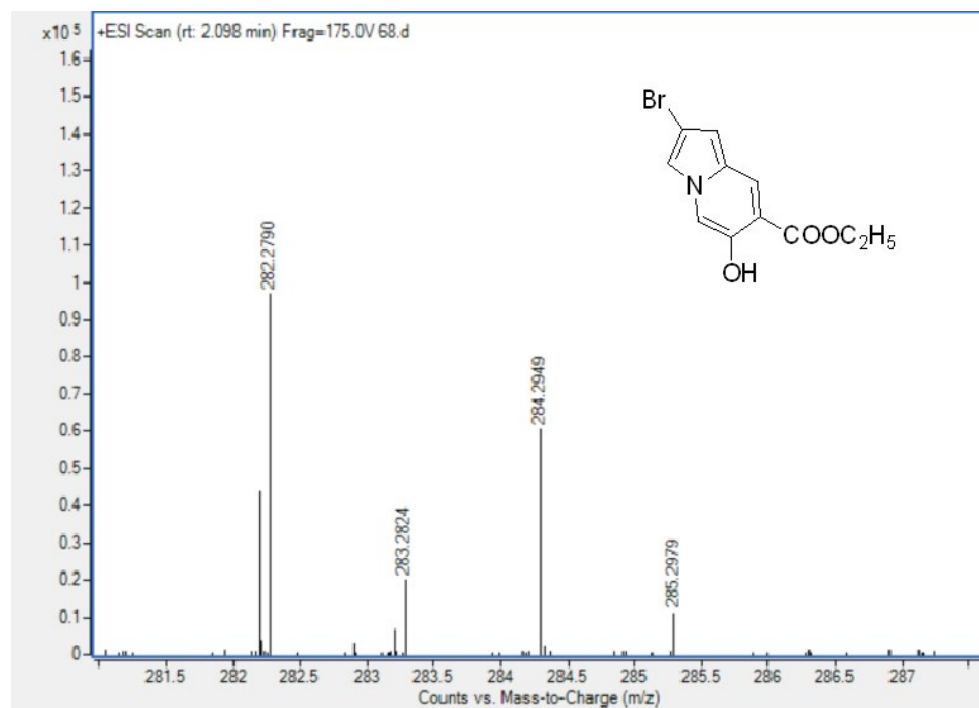

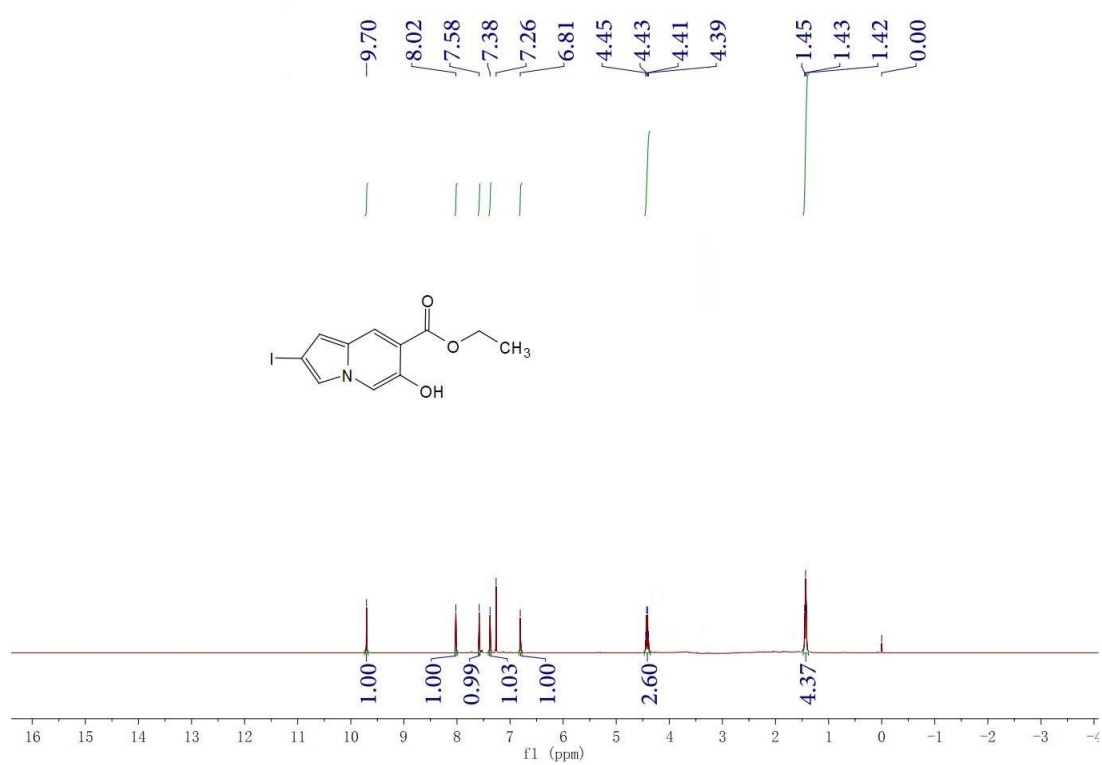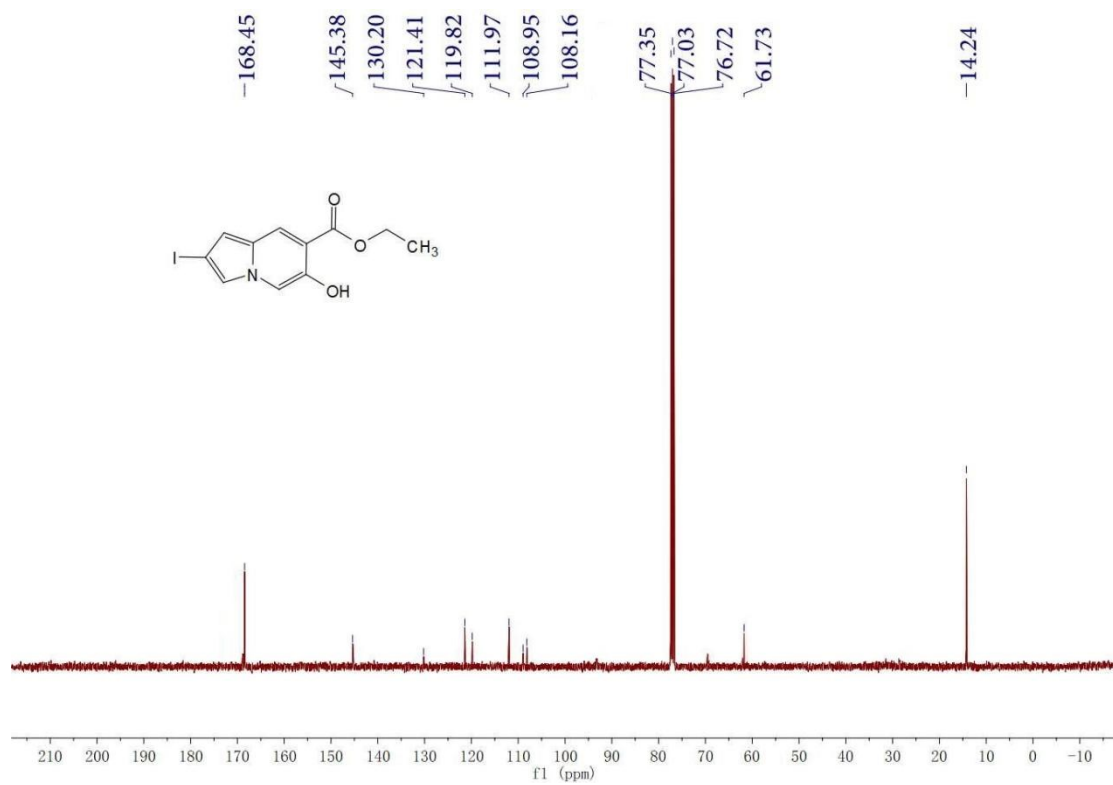

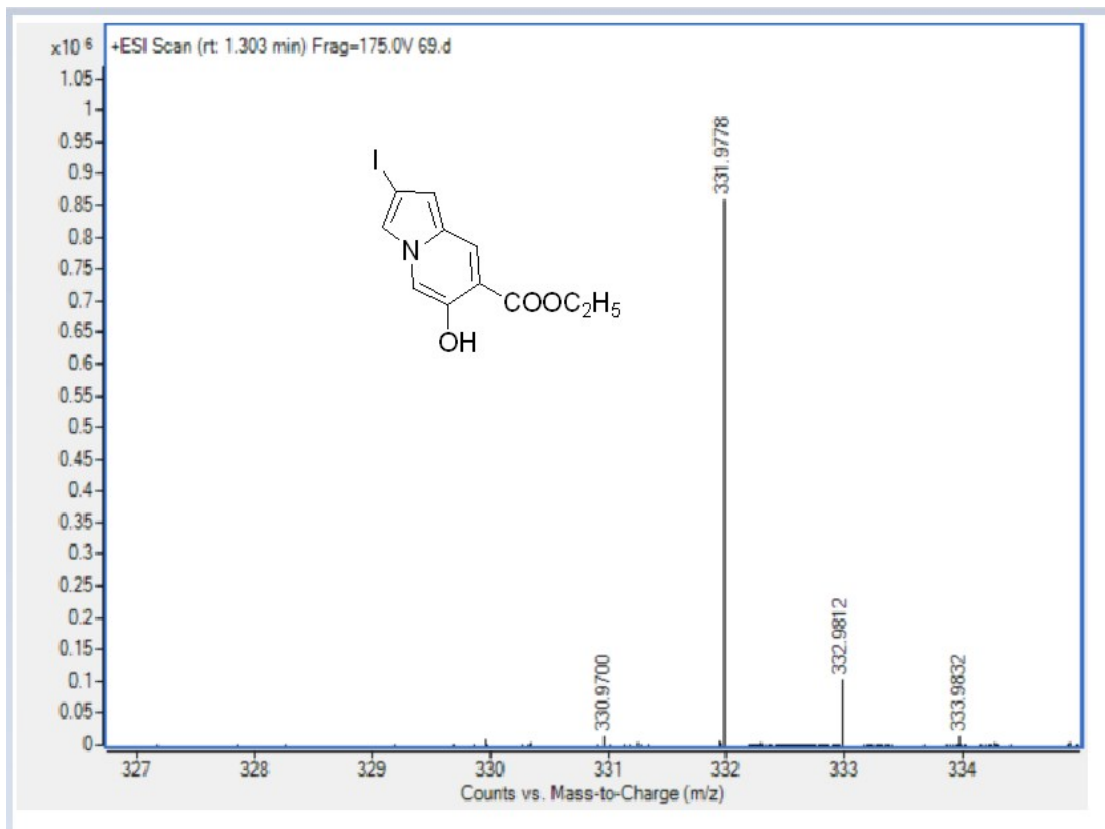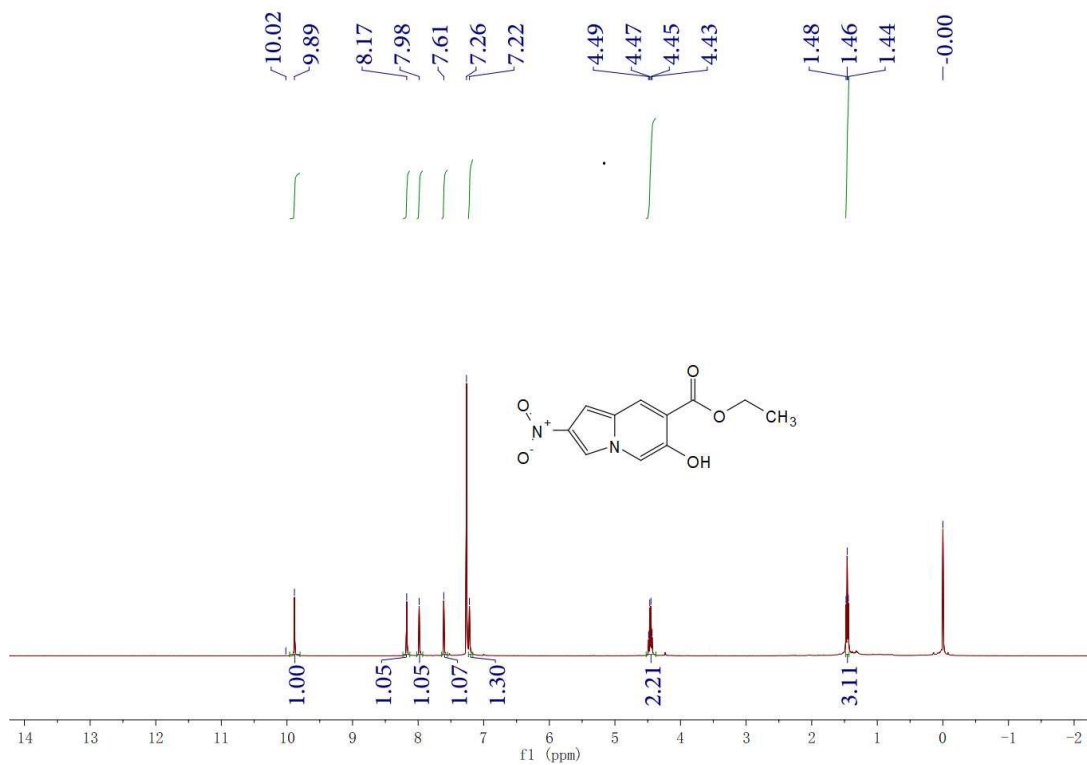

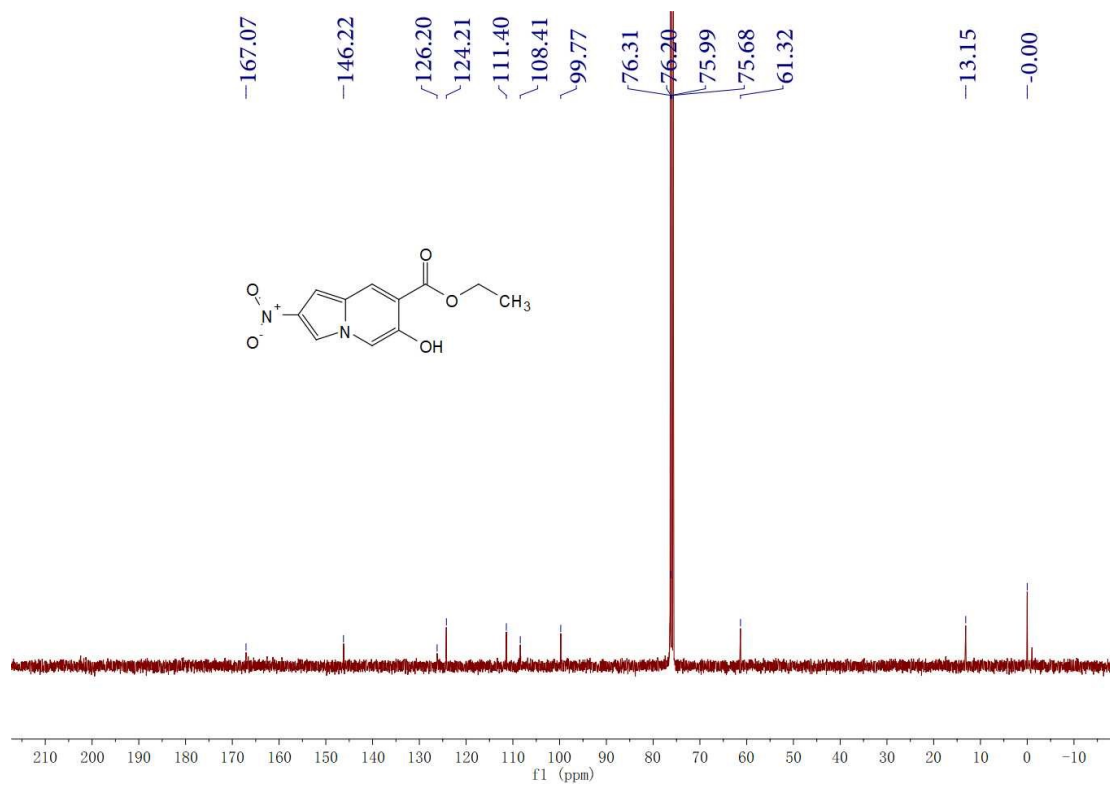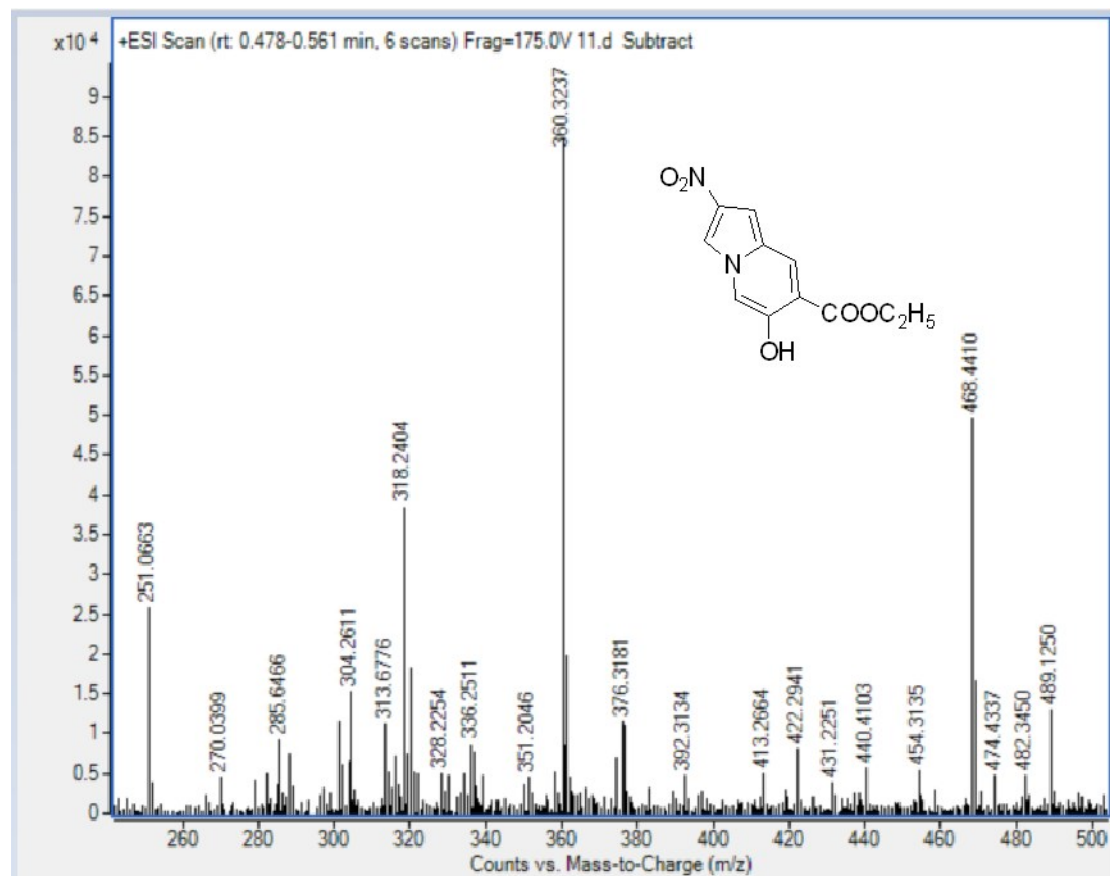



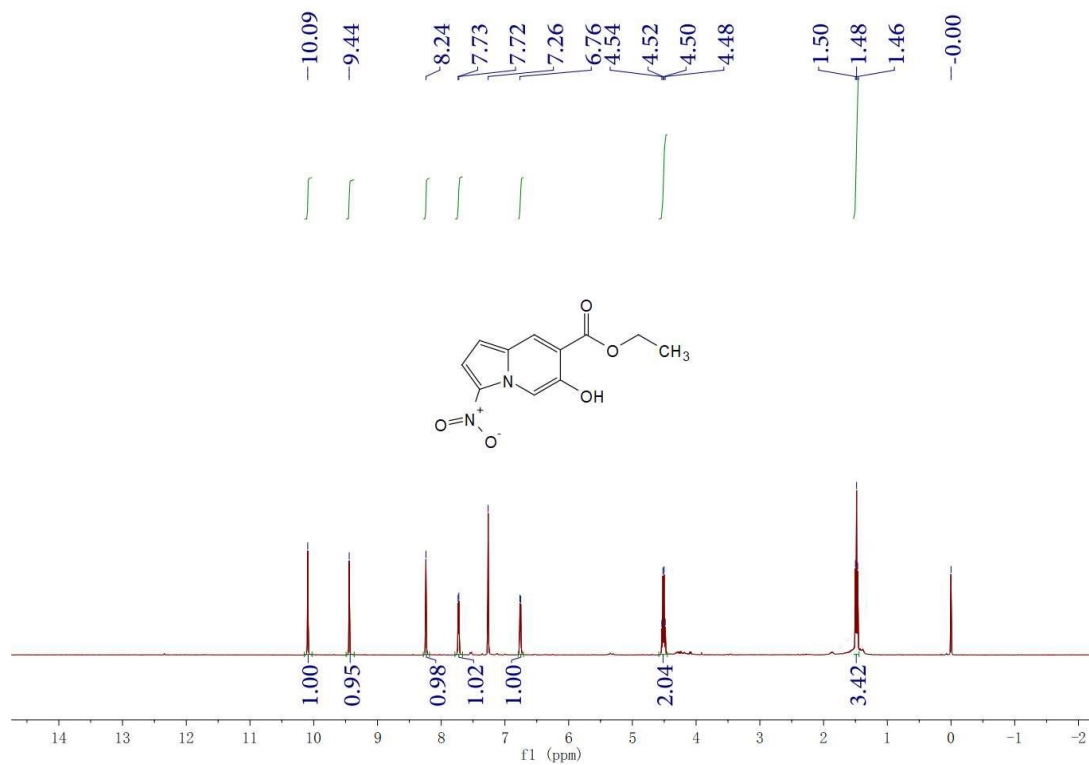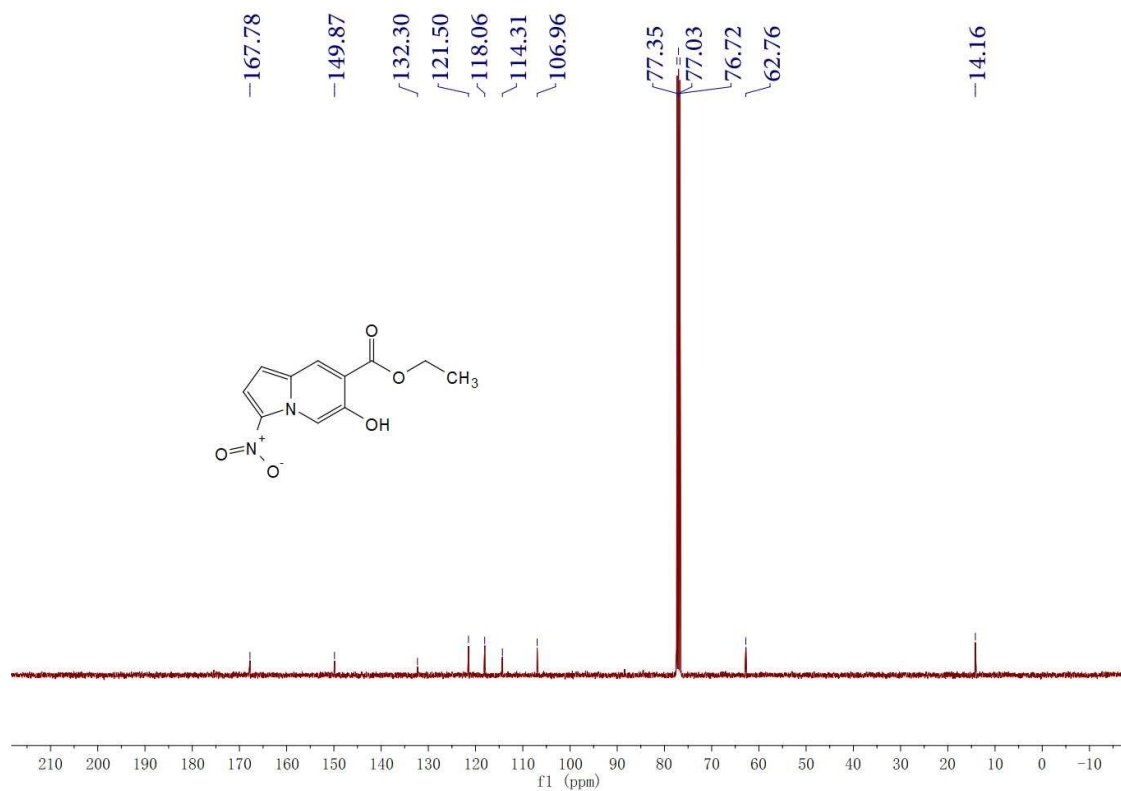

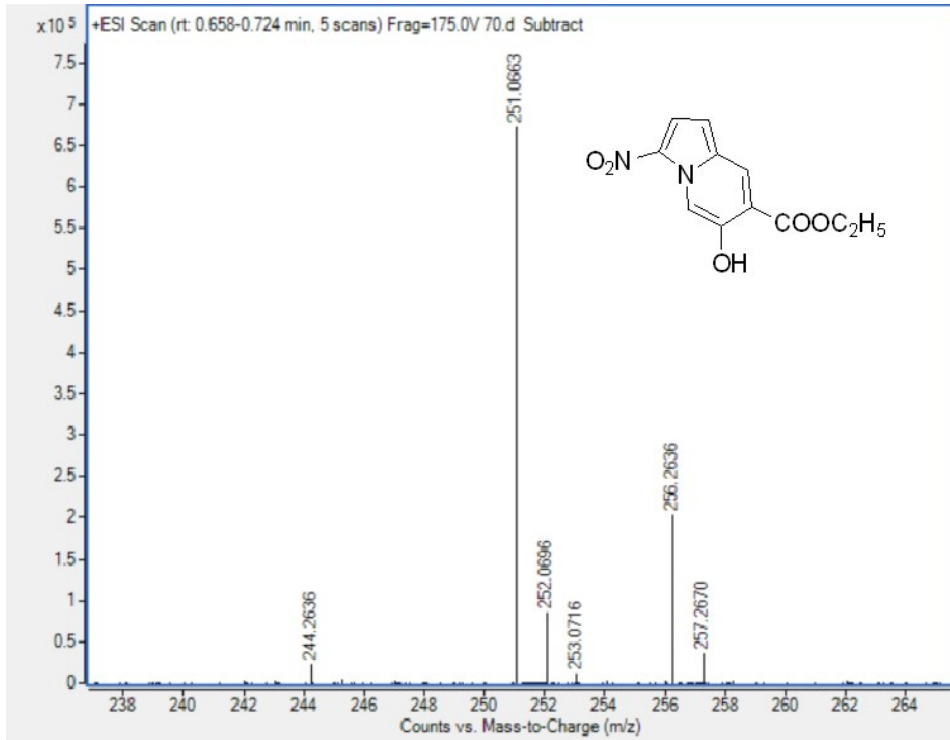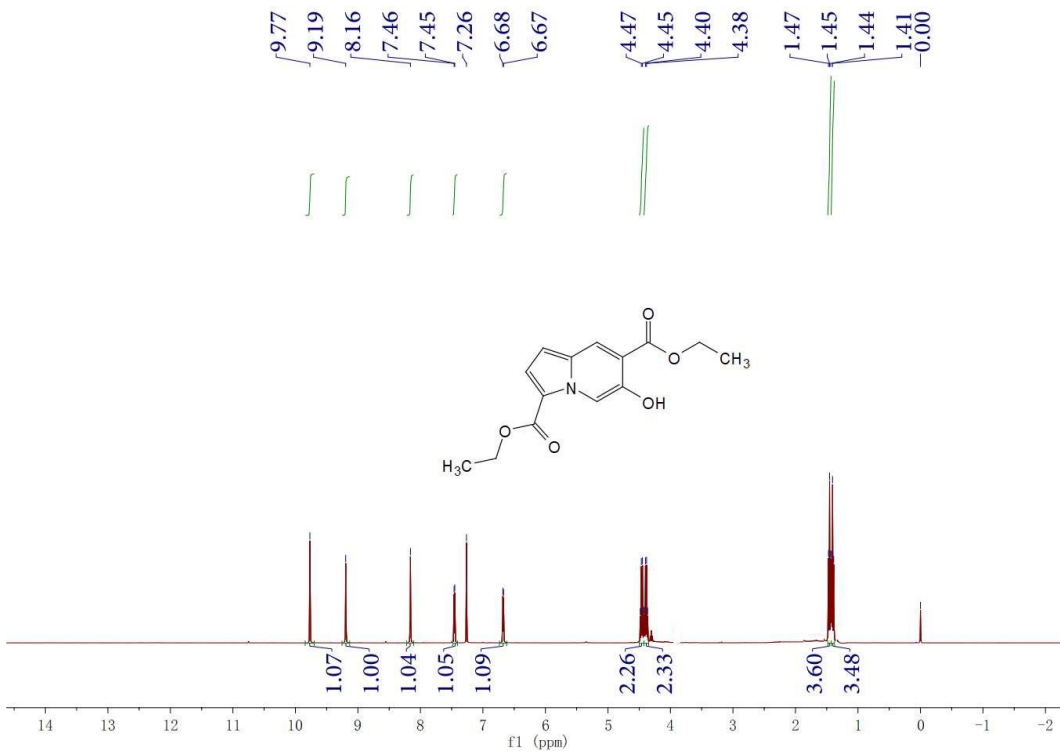

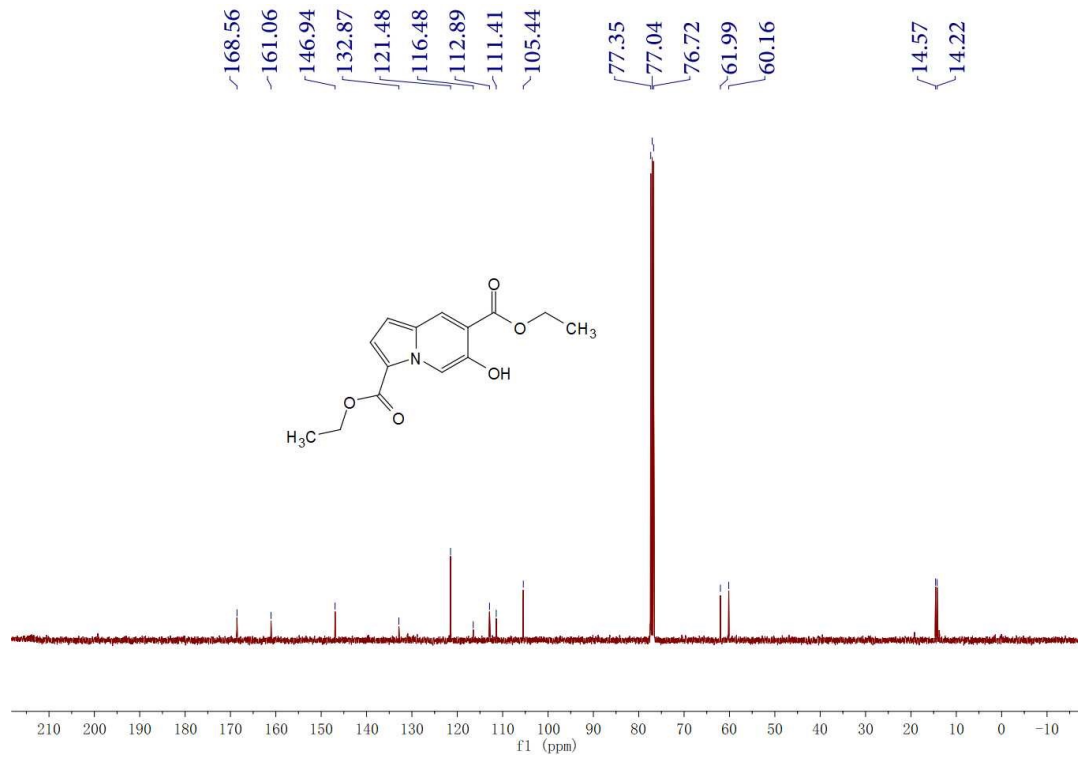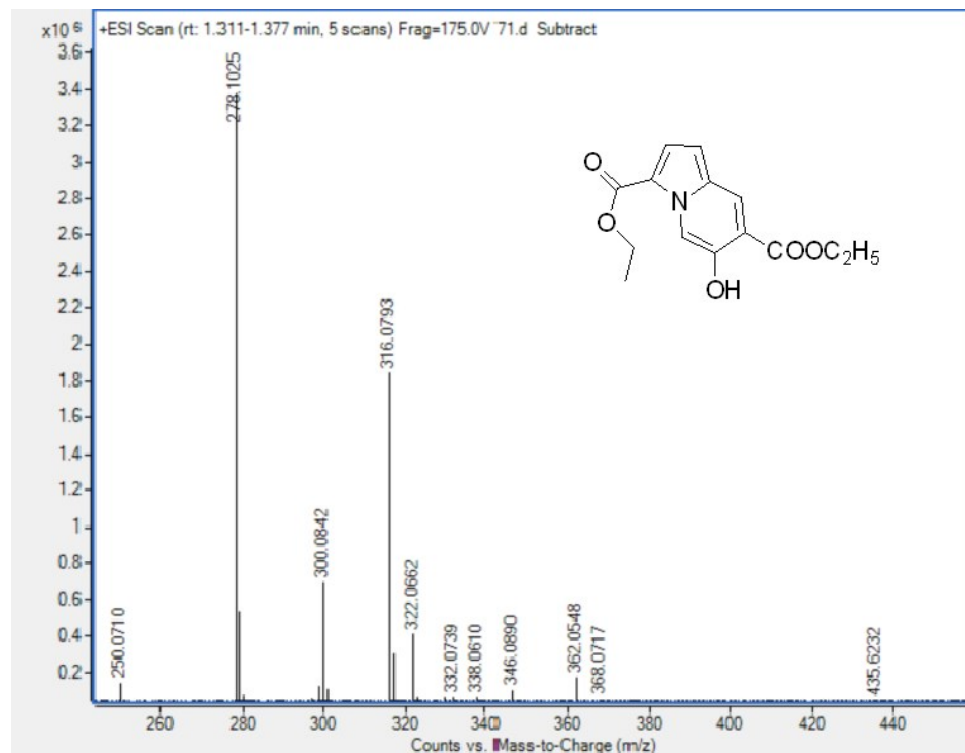

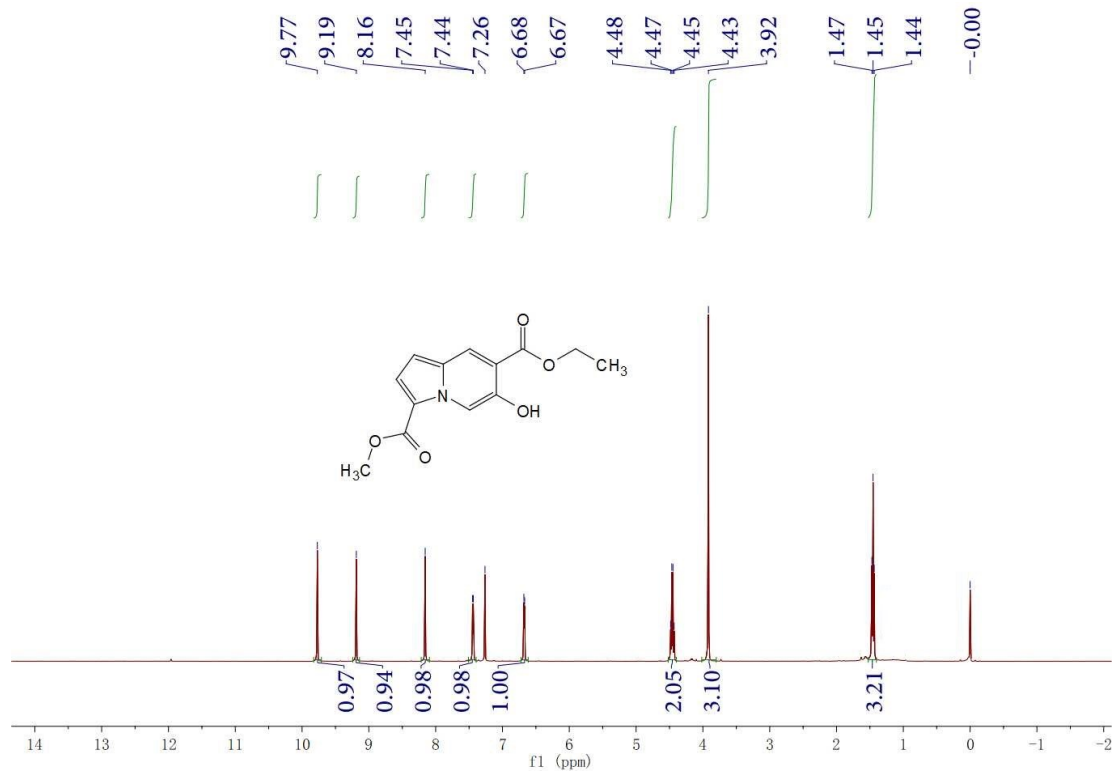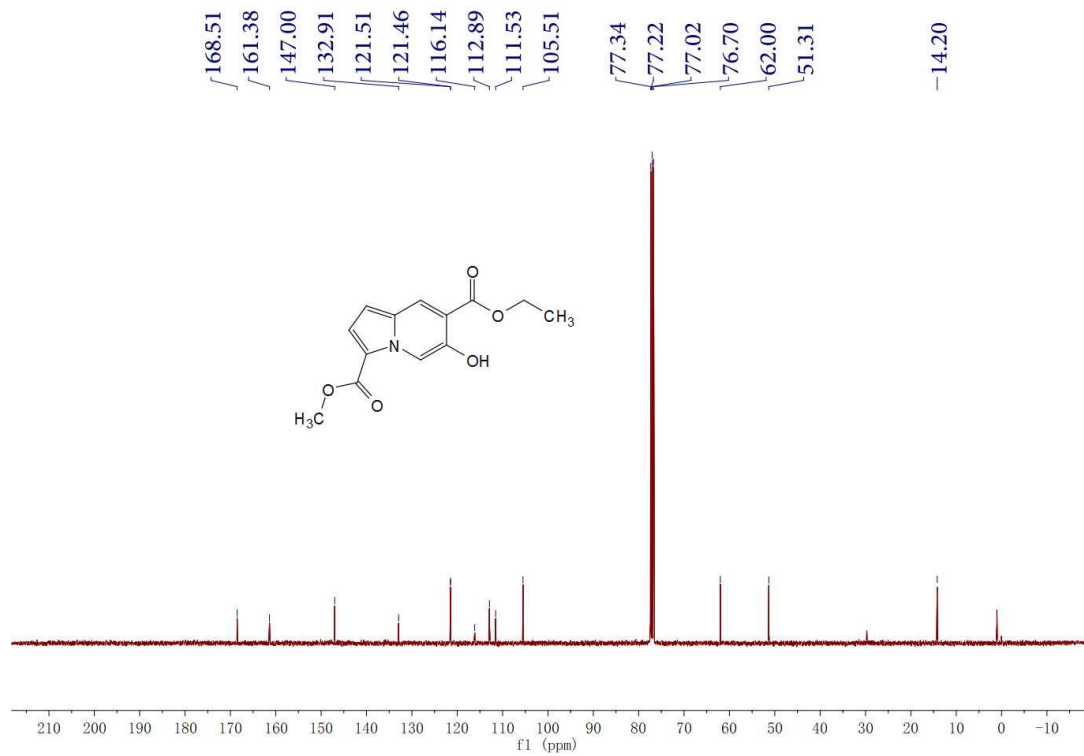

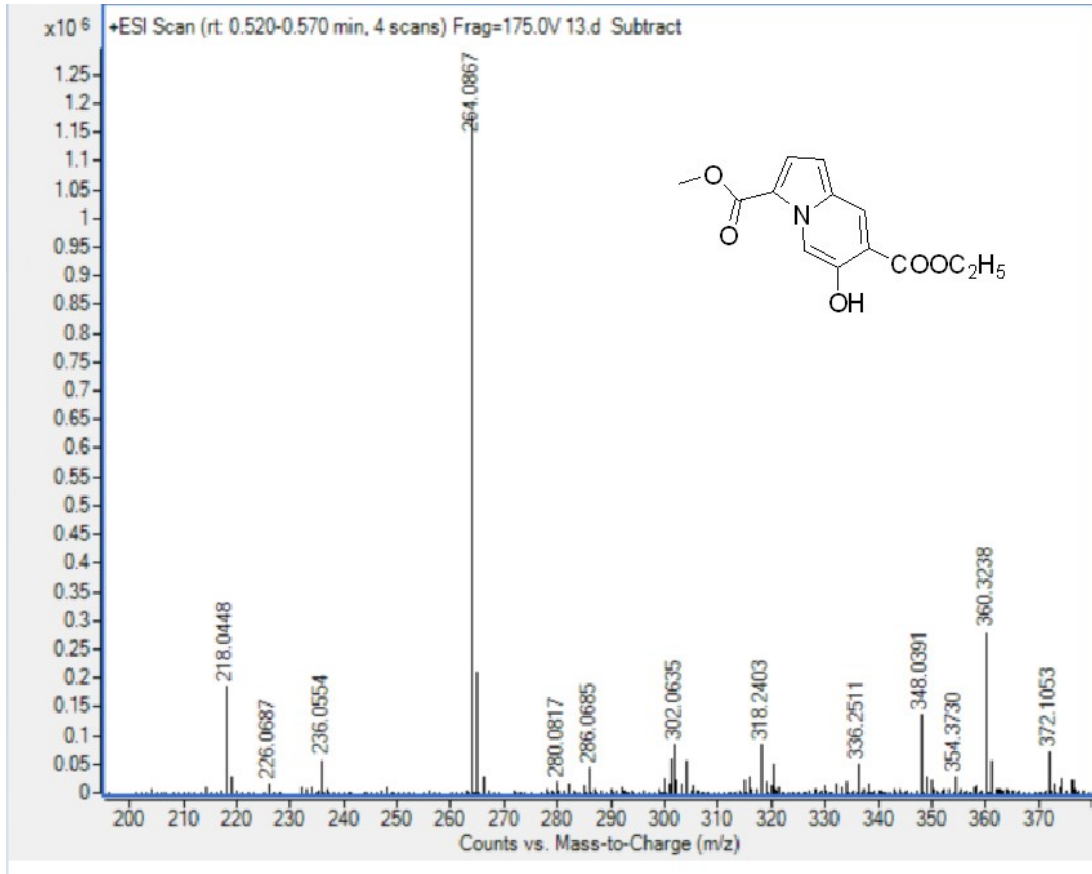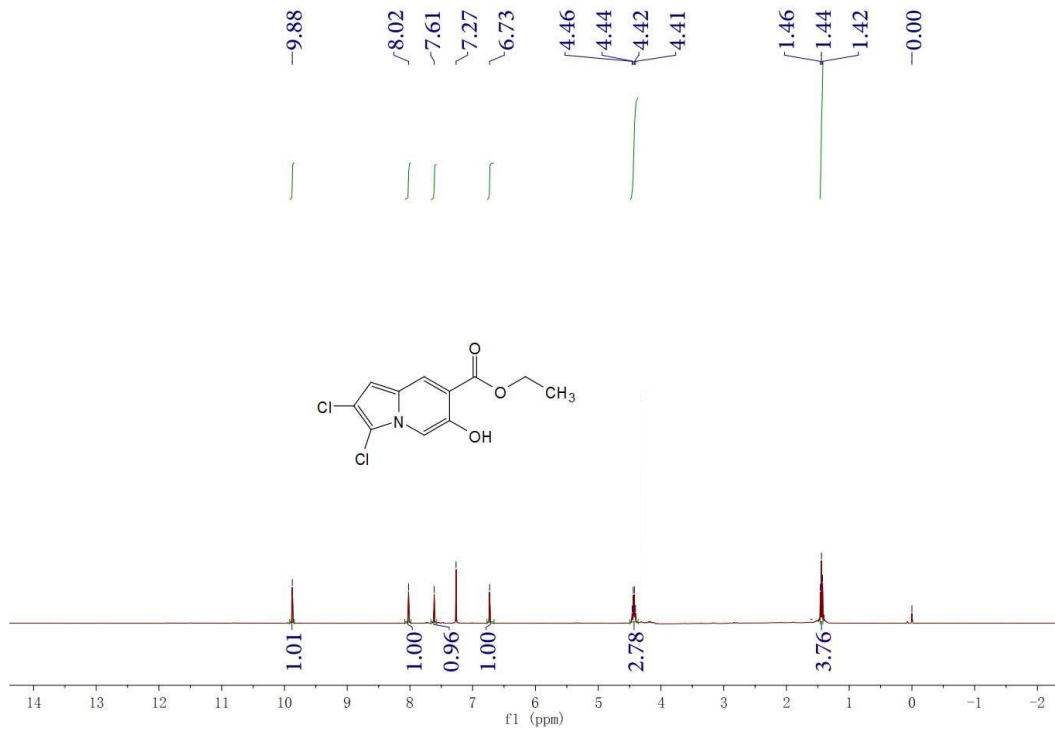

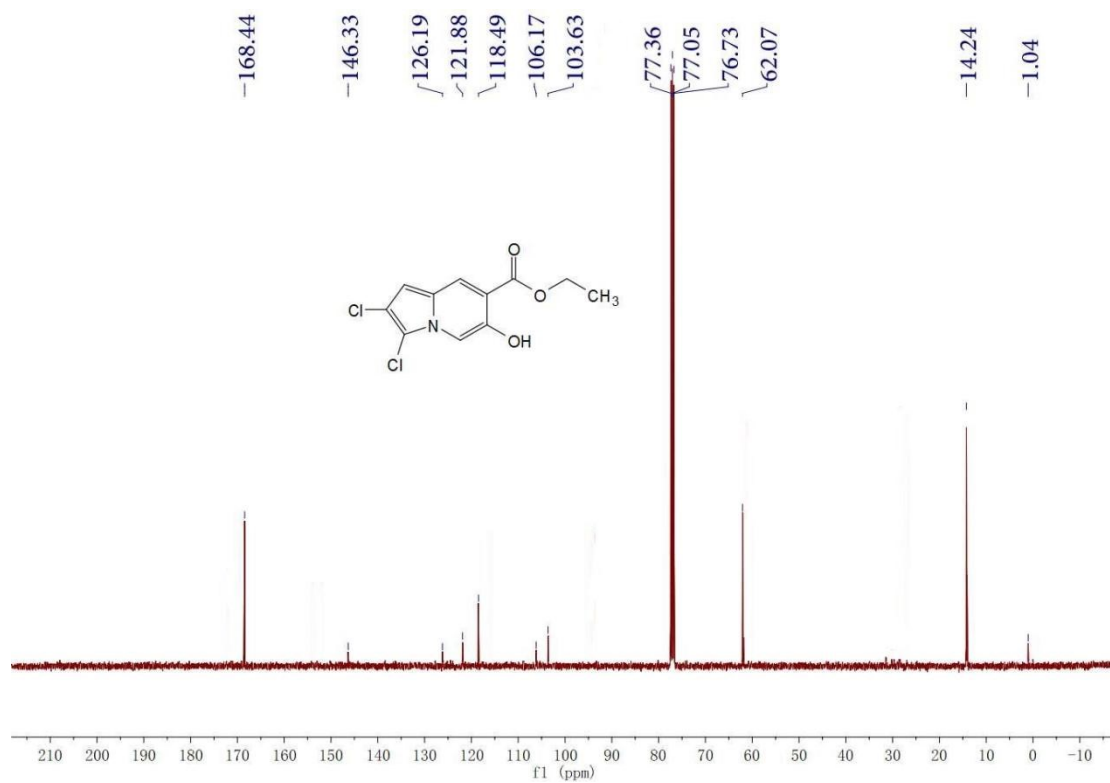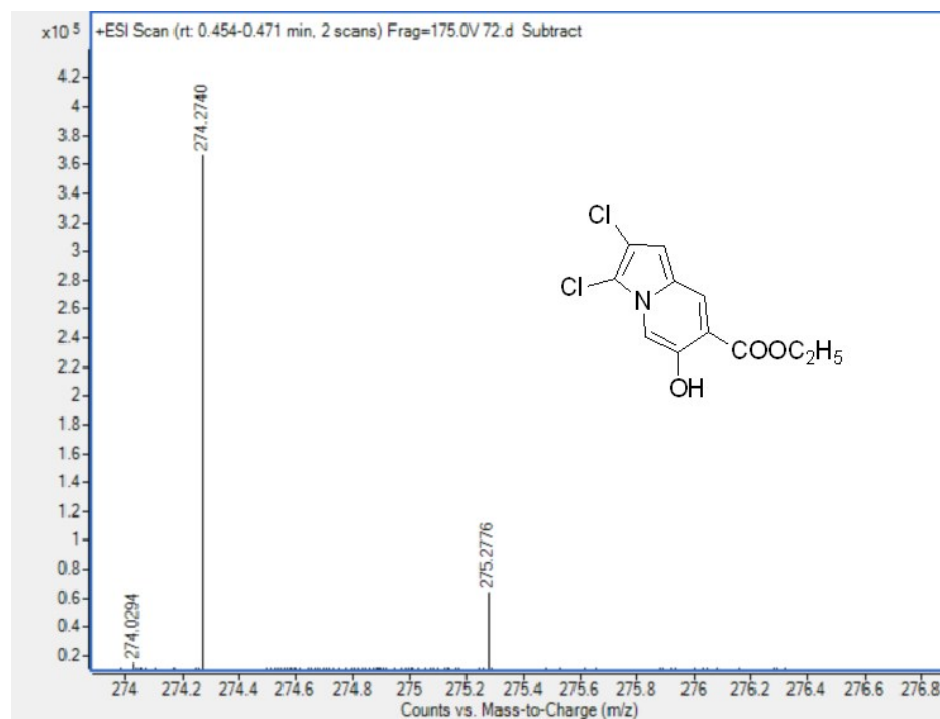

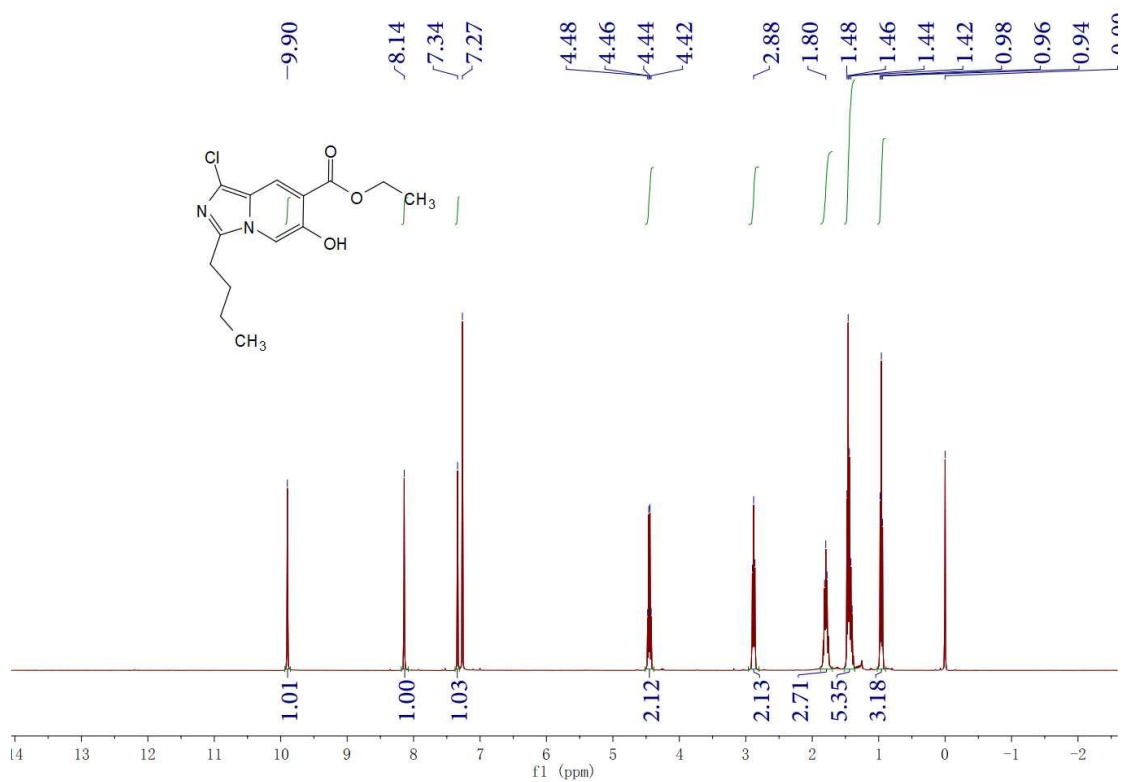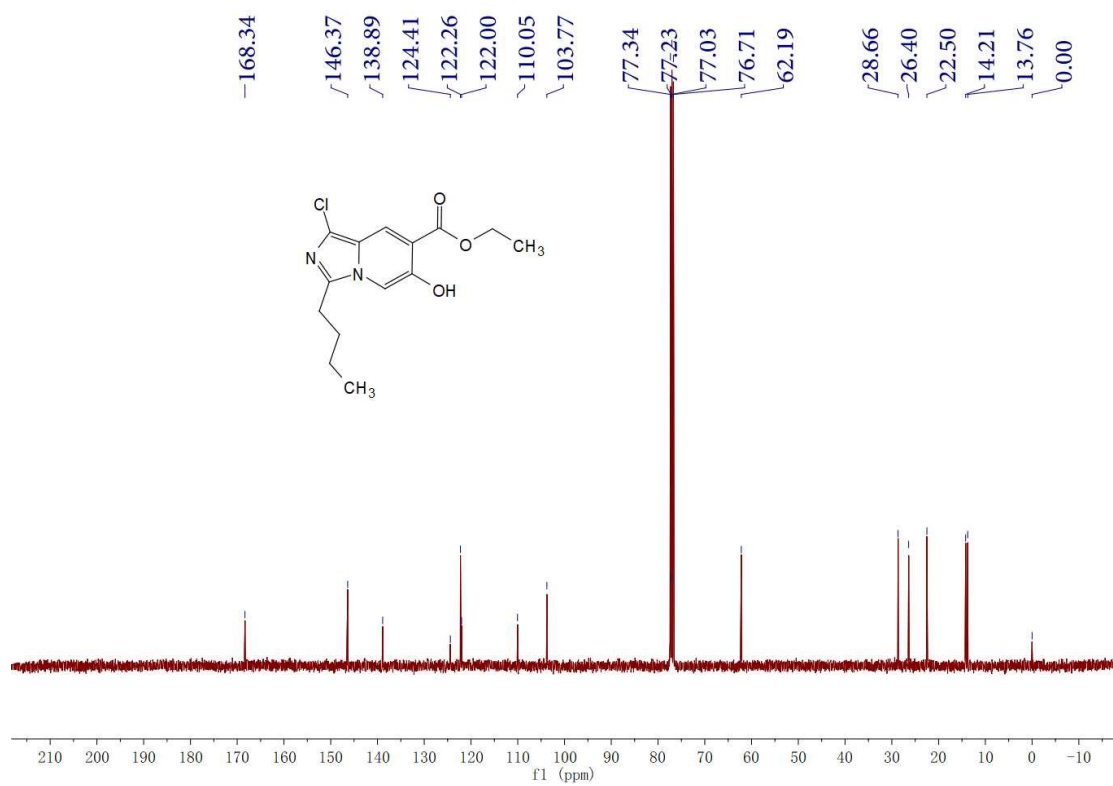

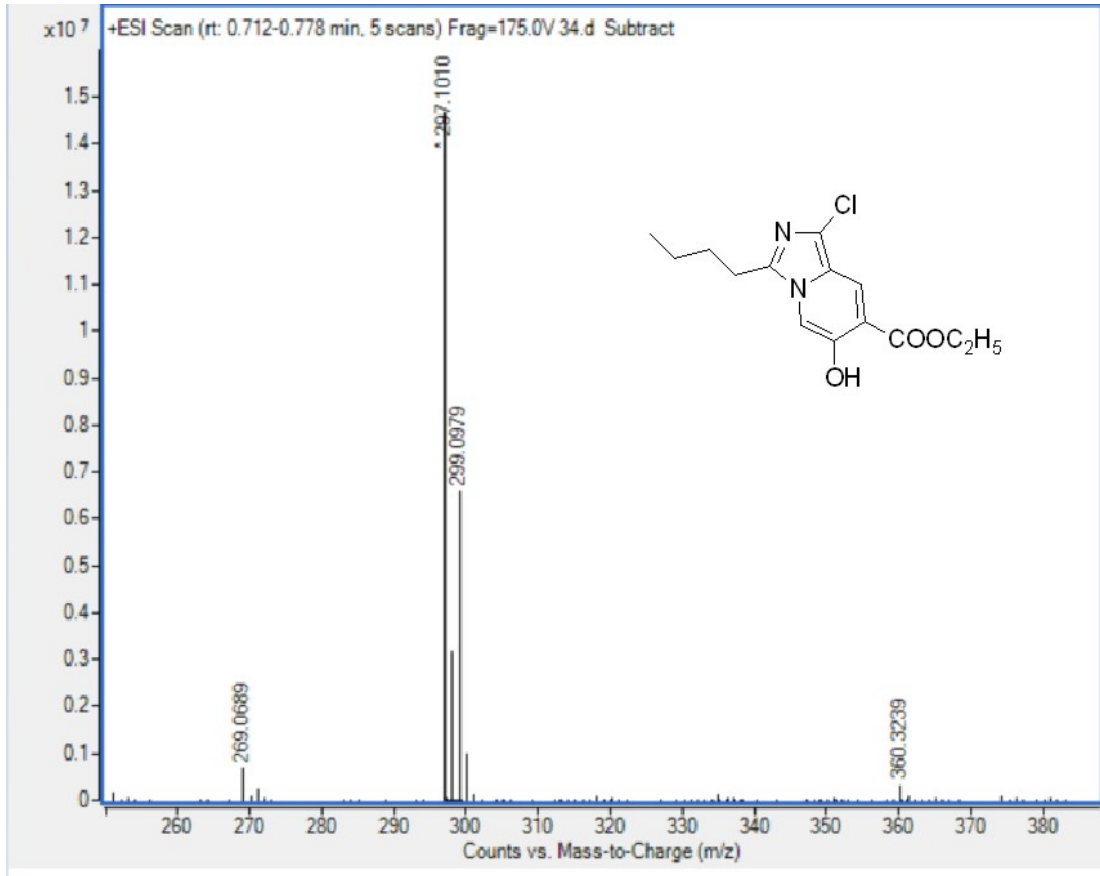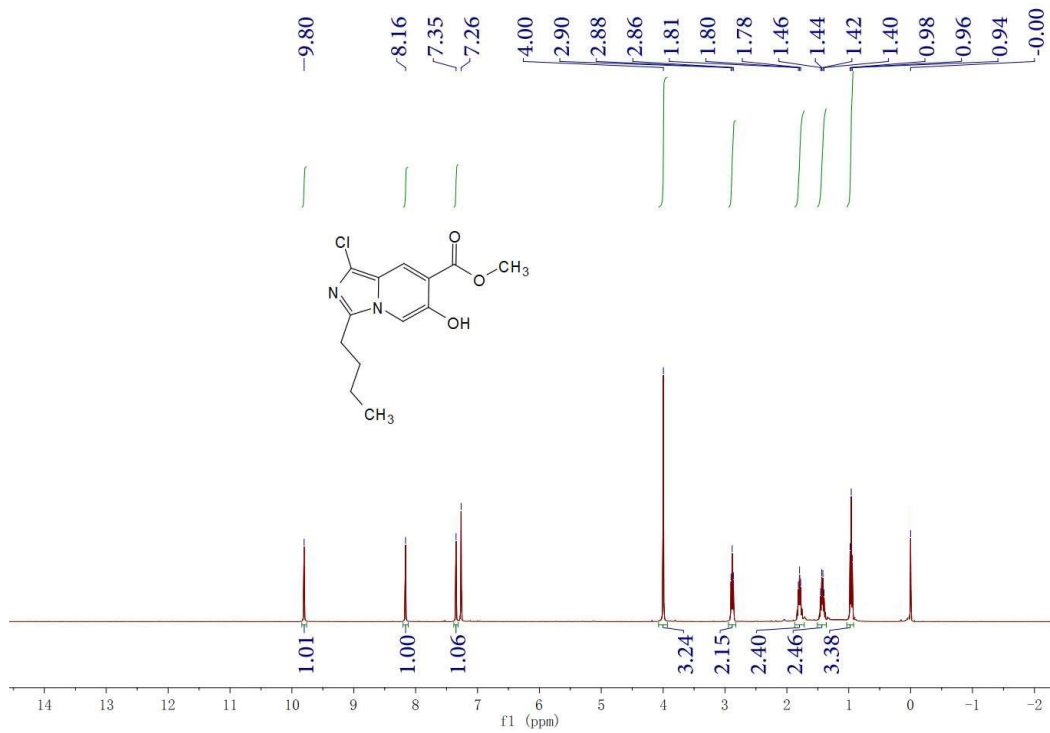



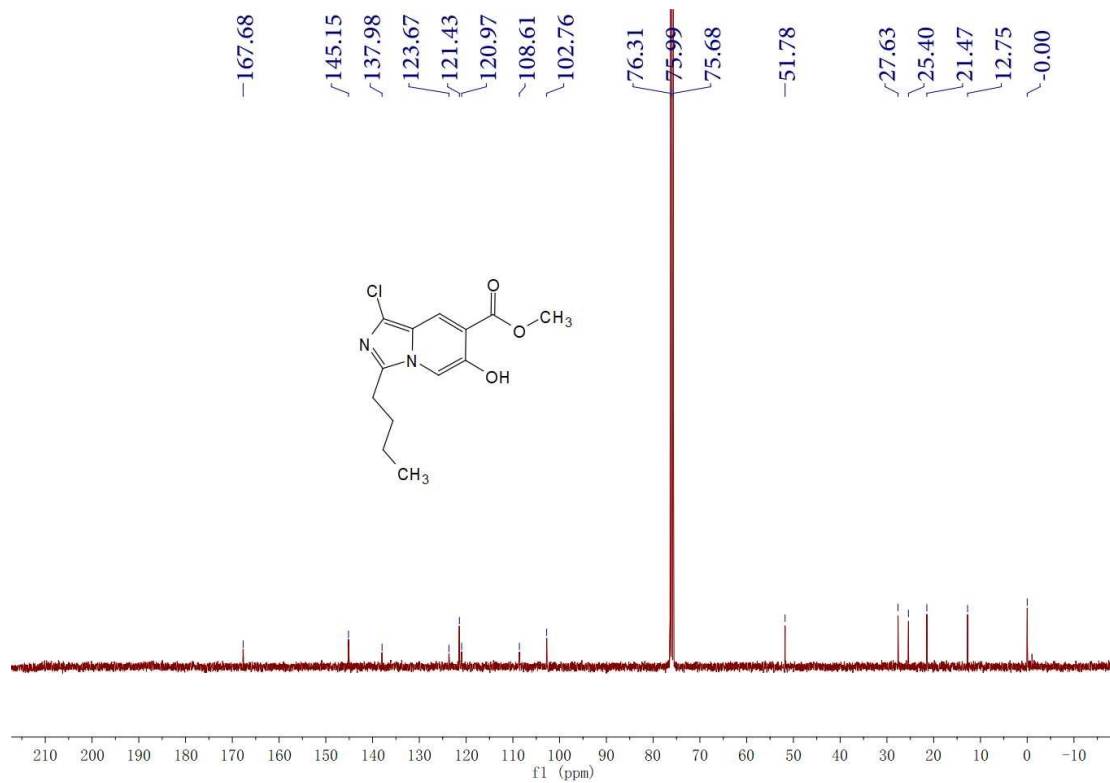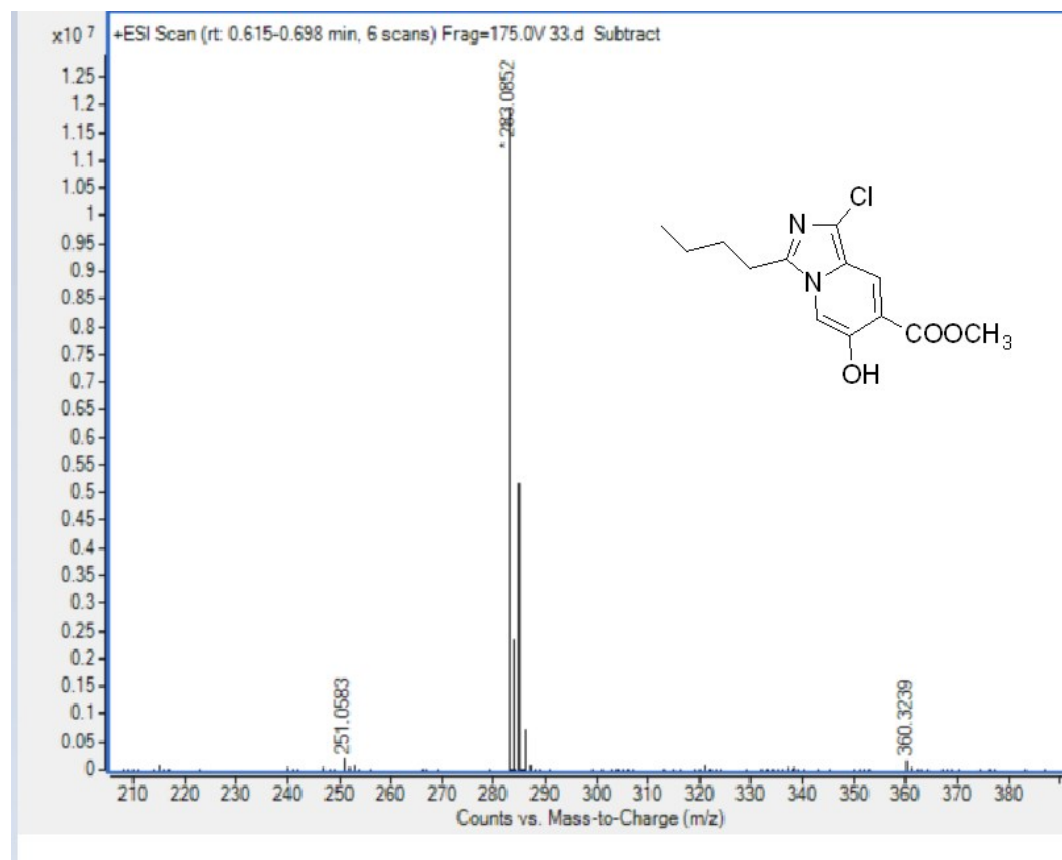

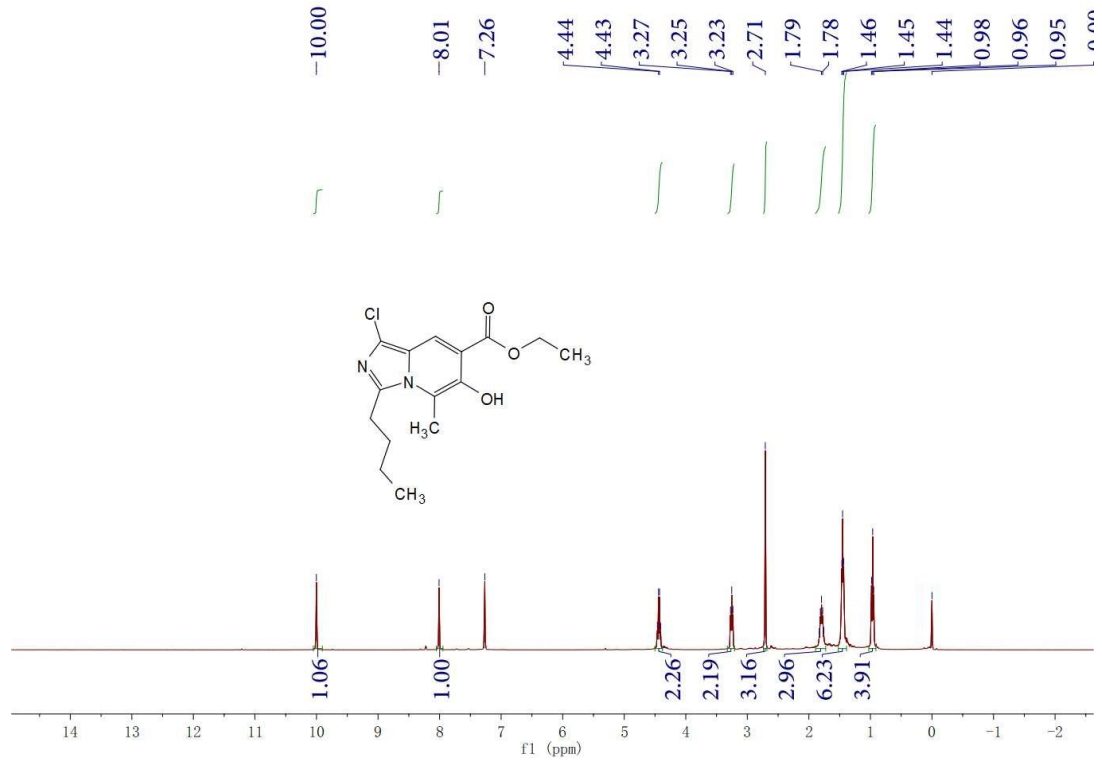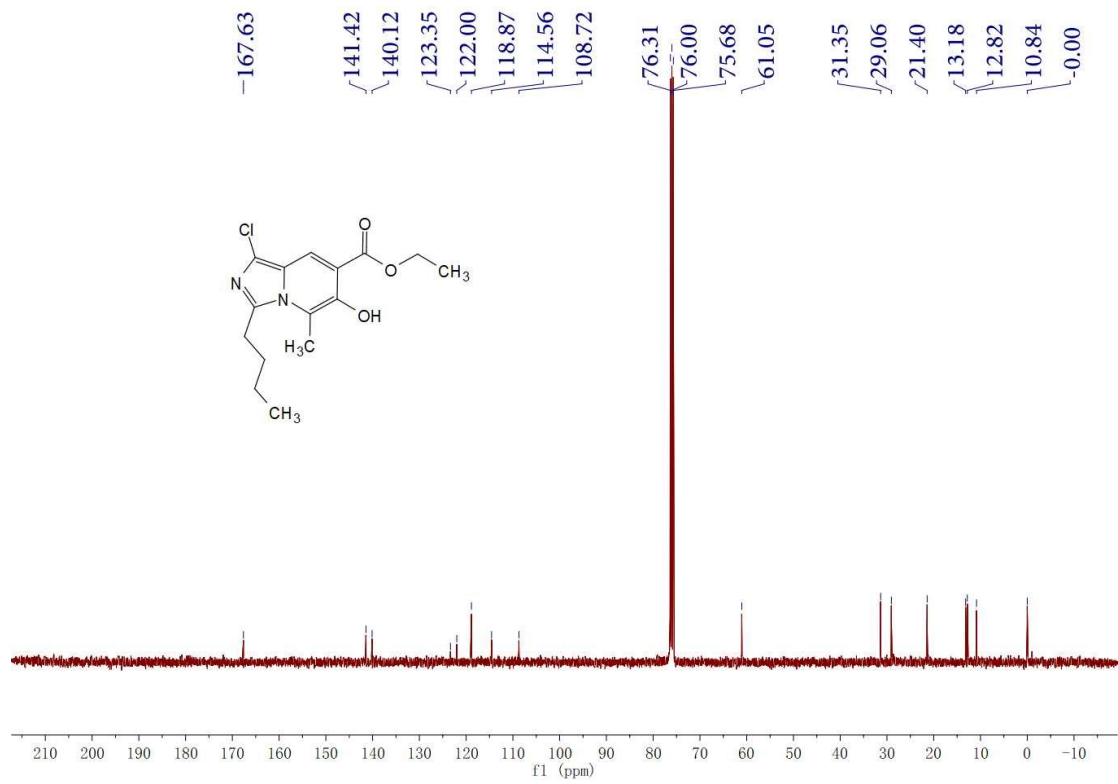

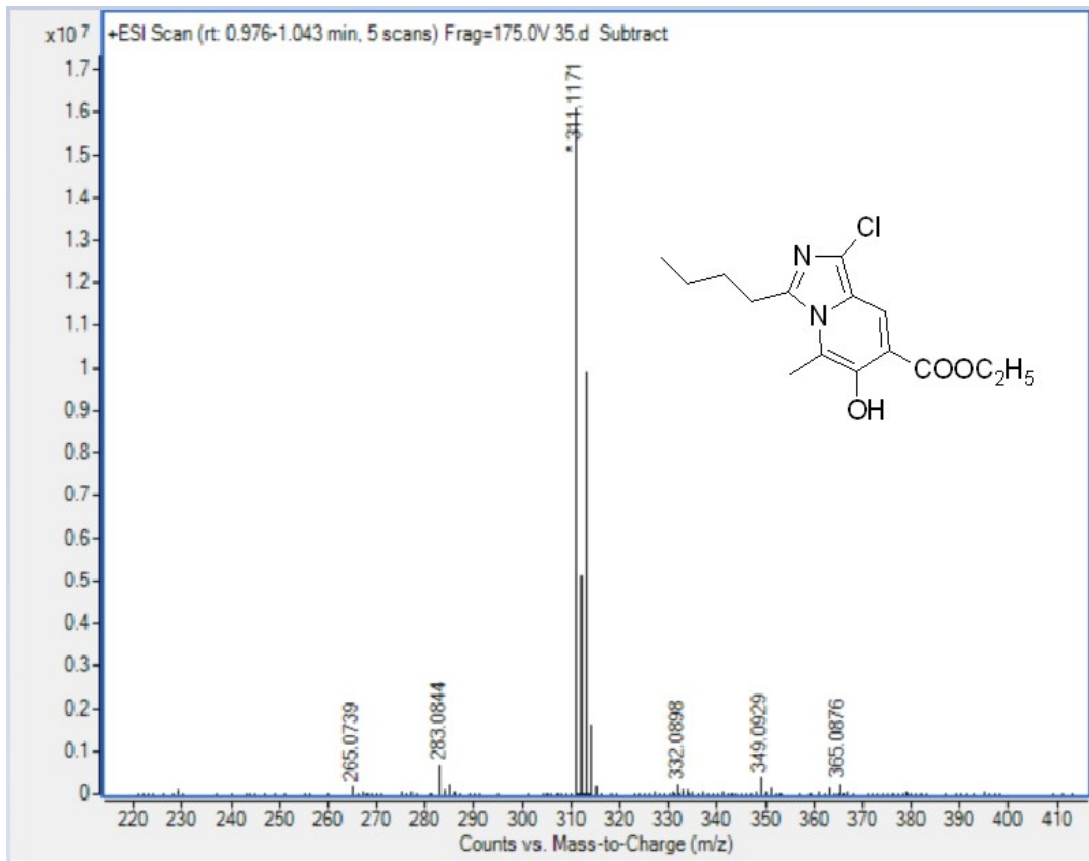

Supplement: d1ra04425g1.pdf [file d1ra04425g1.pdf]
